# **Whole-genome sequencing is more powerful than whole-exome sequencing for detecting exome variants**

Aziz Belkadi<sup>a,b,1</sup>, Alexandre Bolze<sup>c,f,1</sup>, Yuval Itan<sup>c</sup>, Quentin B. Vincent<sup>a,b</sup>, Alexander Antipenko<sup>c</sup>, Bertrand Boisson<sup>c</sup>, Jean-Laurent Casanova<sup>a,b,c,d,e,2</sup> and Laurent Abel<sup>a,b,c,2</sup>

<sup>a</sup> Laboratory of Human Genetics of Infectious Diseases, Necker Branch, INSERM U1163, Paris, France, EU

<sup>b</sup> Paris Descartes University, Imagine Institute, Paris, France, EU

<sup>c</sup> St. Giles Laboratory of Human Genetics of Infectious Diseases, Rockefeller Branch, the Rockefeller University, New York, NY, USA

<sup>d</sup> Howard Hughes Medical Institute, New York, NY, USA

<sup>e</sup> Pediatric Hematology-Immunology Unit, Necker Hospital for Sick Children, Paris, France, EU

<sup>f</sup> Present address: Department of Cellular and Molecular Pharmacology, California Institute for Quantitative Biomedical Research, University of California, San Francisco, CA, USA

<sup>1,2</sup> Equal contributions

Corresponding authors: Jean-Laurent Casanova ([casanova@rockefeller.edu](mailto:casanova@rockefeller.edu)) or Laurent Abel ([laurent.abel@inserm.fr](mailto:laurent.abel@inserm.fr))

Key words :

Next generation sequencing, exome, genome, genetic variants, Mendelian disorders

## Abstract

We compared whole-exome sequencing (WES) and whole-genome sequencing (WGS) for the detection of single-nucleotide variants (SNVs) in the exomes of six unrelated individuals. In the regions targeted by exome capture, the mean number of SNVs detected was 84,192 for WES and 84,968 for WGS. Only 96% of the variants were detected by both methods, with the same genotype identified for 99.2% of them. The distributions of coverage depth (CD), genotype quality (GQ), and minor read ratio (MRR) were much more homogeneous for WGS than for WES data. Most variants with discordant genotypes were filtered out when we used thresholds of  $CD \geq 8X$ ,  $GQ \geq 20$ , and  $MRR \geq 0.2$ . However, a substantial number of coding variants were identified exclusively by WES (105 on average) or WGS (692). We Sanger sequenced a random selection of 170 of these exclusive variants, and estimated the mean number of false-positive coding variants per sample at 79 for WES and 36 for WGS. Importantly, the mean number of real coding variants identified by WGS and missed by WES (656) was much larger than the number of real coding variants identified by WES and missed by WGS (26). A substantial proportion of these exclusive variants (32%) were predicted to be damaging. In addition, about 380 genes were poorly covered ( $\sim 27\%$  of base pairs with  $CD < 8X$ ) by WES for all samples, including 49 genes underlying Mendelian disorders. We conclude that WGS is more powerful and reliable than WES for detecting potential disease-causing mutations in the exome.

## Introduction

Whole-exome sequencing (WES) is now routinely used for detecting rare and common genetic variants in humans (1–7). Whole-genome sequencing (WGS) is becoming an attractive alternative approach, due to its decreasing cost (8, 9). However, it remains difficult to interpret variants lying outside the coding regions of the genome. Diagnostic and research laboratories, whether public or private, therefore tend to search for coding variants, which can be detected by WES, first. Such variants can also be detected by WGS, but few studies have compared the efficiencies of WES and WGS for this specific purpose (10–12). Here, we compared WES and WGS for the detection and quality of single-nucleotide variants (SNVs) located within the regions of the human genome covered by WES, using the most recent next-generation sequencing (NGS) technologies. Our goals were to identify the method most efficient and reliable for identifying SNVs in coding regions of the genome, to define the optimal analytical filters for decreasing the frequency of false-positive variants, and to characterize the genes that were hard to sequence by either technique.

## Results

To compare the two NGS techniques, we performed WES with the Agilent Sure Select Human All Exon kit 71Mb (v4 + UTR), and WGS with the Illumina TruSeq DNA PCR-Free sample preparation kit on blood samples from six unrelated Caucasian patients with isolated congenital asplenia (OMIM #271400). We used the genome analysis toolkit (GATK) best-practice pipeline for the analysis of our data (13). We used the GATK Unified Genotyper (14) to call variants, and we restricted the calling process to the regions covered by the Sure Select Human All Exon kit 71Mb plus 50 bp of flanking sequences on either side of the each of the captured regions, for both WES and WGS samples. These regions, referred to as the WES71+50 region, included 180,830 full-length and 129,946 partial protein-coding exons from 20,229 genes (**Table S1**). There were 65 million reads per sample, on average, mapping to this region in WES, corresponding to a mean coverage of 73X (**Table S2**), consistent with the standards set by recent large-scale genomic projects aiming to decipher disease-causing variants by WES (11, 14, 15). On average, 35 million reads per sample mapped to this region by WGS, corresponding to a mean coverage of 39X (**Table S2**). The mean (range) number of SNVs detected was 84,192 (82,940–87,304) per exome and 84,968 (83,340–88,059) per genome. The mean number of SNVs per sample called by both methods was 81,192 (~96% of all variants)

(**Fig. S1A**). For 99.2% of these SNVs, WES and WGS yielded the same genotype, and 62.4% of these concordant SNVs were identified as heterozygous (**Fig. S1B**). These results are similar to those obtained in previous WES studies (1, 5, 16). Most of the remaining SNVs (329 of 415) with discordant genotypes for these two techniques, were identified as homozygous variants by WES and as heterozygous variants by WGS. A smaller number of variants (86, on average), were identified as heterozygous by WES and homozygous by WGS (**Fig. S1B**).

We then investigated in WES and WGS data the distribution of the two main parameters assessing SNV quality generated by the GATK variant calling process (14): coverage depth (CD), corresponding to the number of aligned reads covering a single position; and genotype quality (GQ), which ranges from 0 to 100 (higher values reflect more accurate genotype calls). We also assessed the minor read ratio (MRR), which was defined as the ratio of reads for the less covered allele (reference or variant allele) over the total number of reads covering the position at which the variant was called. Overall, we noted reproducible differences in the distribution of these three parameters between WES and WGS. The distribution of CD was skewed to the right in the WES data, with a median at 50X but a mode at 18X, indicating low levels of coverage for a substantial proportion of variants (**Fig. 1A**). By contrast, the distribution of CD was normal-like for the WGS data, with the mode and median coinciding at 38X (**Fig. 1A**). We found that 4.3% of the WES variants had a CD < 8X, versus only 0.4% of the WGS variants. The vast majority of variants called by WES or WGS had a GQ close to 100. However, the proportion of variants called by WES with a GQ < 20 (3.1%) was, on average, twice that for WGS (1.3%) (**Fig. 1B**). MRR followed a similar overall distribution for WES and WGS heterozygous variants, but peaks corresponding to values of MRR of 1/7, 1/6, 1/5 and 1/4 were detected only for the WES variants (**Fig. 1C**). These peaks probably corresponded mostly to variants called at a position covered by only 7, 6, 5 and 4 reads, respectively. The overall distributions of these parameters indicated that the variants detected by WGS were of higher and more uniform quality than those detected by WES.

Next, we looked specifically at the distribution of these parameters for the variants with genotypes discordant between WES and WGS, denoted as discordant variants. The distribution of CD for WES variants showed that most discordant variants had low coverage, at about 2X, with a CD distribution very different from that of concordant variants (**Fig. S2A**). Moreover, most discordant variants had a GQ < 20 and a MRR < 0.2 for WES (**Fig. S2B**). By contrast, the distributions of CD, GQ, and MRR were very similar between WGS variants discordant with

WES results and WGS variants concordant with WES results (**Fig. S2**). All these results indicate that the discordance between the genotypes obtained by WES and WGS was largely due to the low quality of WES calls for the discordant variants. We therefore conducted subsequent analyses by filtering out low-quality variants. We retained SNVs with a  $CD \geq 8X$  and a  $GQ \geq 20$ , as previously suggested (17), and with a  $MRR \geq 0.2$ . Overall, 93.8% of WES variants and 97.8% of WGS variants satisfied the filtering criterion (**Fig. 2A**). We recommend the use of these filters for projects requiring high-quality variants for analyses of WES data. More than half (57.7%) of the WES variants filtered out were present in the flanking 50 bp regions, whereas fewer (37.6%) of the WGS variants filtered out were present in these regions. In addition, 141 filtered WES variants and 70 filtered WGS variants per sample concerned the two base pairs adjacent to the exons, which are key positions for splicing. However, complete removal of the 50 bp flanking regions from the initial calling would result in a large decrease (~90,000) in the number of fully included protein coding exons (**Table S1**). After filtering, the two platforms called an average of 76,195 total SNVs per sample, and the mean proportion of variants for which the same genotype was obtained with both techniques was 99.92% (range: 99.91%-99.93%).

We then studied the high-quality (HQ) variants satisfying the filtering criterion but called by only one platform. On average, 2,734 variants (range: 2,344-2,915) were called by WES but not by WGS (**Fig. 2A**), and 6,841 variants (range: 5,623-7,231) were called by WGS but not WES (**Fig. 2A**). We used Annovar software (18) to annotate these HQ variants as coding variants, i.e., variants overlapping a coding exon, that refers only to coding exonic portion, but not UTR portion. Overall, 651 of the 2,734 WES-exclusive HQ variants and 1,113 of the 6,841 WGS-exclusive HQ variants were coding variants (**Fig. 2A**). Using the Integrative Genomics Viewer (IGV) tool (19), we noticed that most WES-exclusive HQ variants were also present on the WGS tracks with quality criteria that were above our defined thresholds. We were unable to determine why they were not called by the Unified Genotyper. We therefore used the GATK Haplotype Caller to repeat the calling of SNVs for the WES and WGS experiments. With the same filters, 282 HQ coding variants were called exclusively by WES and 1,014 HQ coding variants were called exclusively by WGS. We combined the results obtained with Unified Genotyper and Haplotype Caller and limited subsequent analyses to the variants called by both callers. The mean number (range) of HQ coding SNVs called exclusively by WES fell to 105 (51-140) per sample, whereas the number called exclusively by WGS was 692 (506-802) (**Fig. 2B**) indicating that calling issues may account for ~80% of initial WES exclusive coding

variants and ~40% of initial WGS exclusive coding variants. The use of a combination of Unified Genotyper and Haplotype Caller therefore appeared to increase the reliability and accuracy of calls. With this combination, we obtained an average of 74,398 HQ SNVs (range: 72,867-77,373) called by both WES and WGS of which 19,222 (18,823-20,024) were coding variants; an average of 1,687 SNVs (range: 1,644-1,749) called by WES only; and 1,915 SNVs (range: 1,687-2,038) called by WGS only (**Fig. 2B**). The quality and distribution of CD, GQ and MRR obtained with this combined calling process were similar to those previously reported for Unified Genotyper (**Fig. S3**).

We further investigated the HQ coding variants called exclusively by one method when a combination of the two callers was used. We were able to separate the variants identified by only one technique into two categories: 1) those called by a single method and not at all by the other, which we refer to as fully exclusive variants, and 2) those called by both methods but filtered out by one method, which we refer to as partly exclusive variants. Of the HQ coding variants identified by WES only (105, on average, per sample), 61% were fully exclusive and 39% were partly exclusive. Of those identified by WGS only (692, on average) 21% were fully exclusive and 79% were partly exclusive. We performed Sanger sequencing on a random selection of 170 fully and partly exclusive WES/WGS variants. Out of 44 fully exclusive WES variants successfully Sanger sequenced, 40 (91%) were absent from the true sequence, indicating that most fully exclusive WES variants were false positives (**Table 1 and Table S3**). In contrast, 39 (75%) of the 52 Sanger-sequenced fully exclusive WGS variants were found in the sequence, with the same genotype as predicted by WGS (including 2 homozygous), and 13 (25%) were false positives (**Table 1 and Table S3**). These results are consistent with the observation that only 27.2% of the fully exclusive WES variants were reported in the 1000 genomes database (20), whereas most of the fully exclusive WGS variants (84.7%) were present in this database, with a broad distribution of minor allele frequencies (MAF) (**Fig. S4A**). Similar results were obtained for the partly exclusive variants. Only 10 (48%) of the 21 partly exclusive WES variants (including 3 homozygous) were real, whereas all (100%) of the 24 partly exclusive WGS variants (including 8 homozygous) were real. Using these findings, we estimated the overall numbers of false-positive and false-negative variants detected by these two techniques. WES identified a mean of 26 real coding variants per sample (including 5 homozygous) that were missed by WGS, and a mean of 79 false-positive variants. WGS identified a mean of 656 real coding variants per sample (including 104 homozygous) that were missed by WES, and a mean of 36 false-positive variants.

We noted that most of the false-positive fully exclusive WGS variants were located in the three genes (*ZNF717*, *OR8U1*, and *SLC25A5*) providing the largest number of exclusive variants on WGS (**Table S4**). Further investigations of the reads corresponding to these variants on the basis of blast experiments strongly suggested that these reads had not been correctly mapped (**Table 2**). Overall, we found that the majority of false positive WGS fully exclusive variants (11/13) and only a minority of false positive WES fully exclusive variants (4/40) could be explained by alignment and mapping mismatches (**Table 2**). We then determined whether the exclusive WES/WGS variants were likely to be deleterious and affect the search for disease-causing lesions. The distribution of combined annotation-dependent depletion (CADD) scores (21) for these variants is shown in **Fig S4B**. About 38.6% of the partly exclusive WES variants and 29.9% of the partly and fully exclusive WGS variants, which were mostly true positives, had a phred CADD score > 10 (i.e. they were among the 10% most deleterious substitutions possible in the human genome), and might include a potential disease-causing lesion. We found that 54.6% of fully exclusive WES variants, most of which were false positives, had a phred CADD score > 10, and could lead to useless investigations. Finally, we investigated whether some genes were particularly poorly covered by WES despite being targeted by the kit we used, by determining, for each sample, the 1,000 genes (approximately 5% of the full set of genes) with the lowest WES coverage (**Fig. S5**). Interestingly, 75.1% of these genes were common to at least four samples (of 6), and 38.4% were present in all six individuals. The percentage of exonic base pairs (bp) with more than 8X coverage for these 384 genes was, on average, 73.2% for WES (range: 0%-86.6%) and 99.5% for WGS (range: 63.6%-100%) (**Table S5**). These genes with low WES coverage in all patients comprised 47 genes underlying Mendelian diseases, including *EWSR1*, the causal gene of Ewing sarcoma, three genes (*IMPDH1*, *RDH12*, *NMNAT1*) responsible for Leber congenital amaurosis, and two genes (*IFNGR2*, *IL12B*) responsible for Mendelian susceptibility to mycobacterial diseases (**Table S5**).

## Discussion

These results demonstrate that WGS can detect hundreds of potentially damaging coding variants per sample of which ~16% are homozygous, including some in genes known to be involved in Mendelian diseases, that would have been missed by WES in the regions targeted by the exome kit. In addition to the variants missed by WES in the targeted regions, a large number of genes, protein-coding exons, and non-coding RNA genes were not investigated by



WES despite being fully sequenced by WGS (**Fig. 3**). Finally, mutations outside protein-coding exons, or not in exons at all, might also affect the exome covered by WES, as mutations in the middle of long introns might impair the normal splicing of the exons (22). These mutations would be missed by WES, but would be picked up by WGS (and selected as candidate mutations if the mRNAs were studied in parallel, for example by RNAseq). The principal factors underlying the heterogeneous coverage of WES are probably related to the hybridization/capture and PCR amplification steps required for the preparation of sequencing libraries for WES (23). Here, we clearly confirmed that WGS provides much more uniform distribution of sequencing quality parameters (CD, GQ, MRR) than WES, as recently reported (12). In addition, we performed Sanger sequencing on a large number of variants to obtain a high-resolution estimate of the number of false positives and false negatives in both WES and WGS (**Fig. 3**). We further showed that a number of false-positive results, particularly for the WGS data, probably resulted from mapping problems. We also carried out a detailed characterization of the variants and genes for which the two methods yielded the most different results, providing a useful resource for investigators trying to identify the most appropriate sequencing method for their research projects. Further studies will explore whether similar results are also obtained for other types of variants (e.g. indels, CNVs). We provide open access to all the scripts used to perform this analysis at the software website GITHUB ([https://github.com/HGID/WES\\_vs\\_WGS](https://github.com/HGID/WES_vs_WGS)). We hope that researchers will find these tools helpful for analyses of data obtained by WES and WGS, two techniques that will continue to revolutionize human genetics and medicine.



## Material and Methods

### Study subjects:

The six subjects for this study (four females, two males) were collected in the context of a project on Isolated Congenital Asplenia (24). They were all of Caucasian origin (two from USA, and one from Spain, Poland, Croatia, and France), and unrelated. This study was conducted under the oversight of the Rockefeller University IRB. Written consent was obtained from all patients included in this study.

### High-throughput Sequencing:

DNA was extracted from the ficoll pellet of 10mL of blood in heparin tubes. Four to six  $\mu$ g of unamplified, high molecular weight, RNase treated genomic DNA was used for WES and WGS. WES and WGS were done at the New York Genome Center (NYGC) using an Illumina HiSeq 2000. WES was performed using the Agilent 71Mb (V4 + UTR) single sample capture. Sequencing was done with 2x100 base-pairs (bps) paired-end reads, and 5 samples per lane were pooled. WGS was performed using the TruSeq DNA prep kit. Sequencing was done with the aim of 30X coverage from 2x100bp paired-end reads.

### Analysis of high-throughput sequencing data:

We used the Genome Analysis Software Kit (GATK) best practice pipeline to analyse our WES and WGS data (13). Reads were aligned to the human reference genome (hg19) using the Maximum Exact Matches algorithm in Burrows-Wheeler Aligner (BWA) (25). Local realignment around indels was performed by the GATK (14). PCR duplicates were removed using Picard tools (<http://picard.sourceforge.net>). The GATK base quality score recalibrator was applied to correct sequencing artefacts. We called our 6 WES simultaneously together with 24 other WES using Unified Genotyper (UG) (14) as recommended by the software to increase the chance that the UG calls variants that are not well supported in individual samples rather than dismiss them as errors. All variants with a Phred-scaled SNP quality  $\leq 30$  were filtered out. The UG calling process in WGS was similar to that used for WES; we called our 6 WGS together with 20 other WGS. In both WES and WGS, the calling process targeted only regions covered by the WES 71 Mb kit + 50bp flanking each exon (12). When we expanded the WES regions with 100 and 200 bp flanking each exon as performed in some previous studies (26–30), we observed a higher genotype mismatch in variants called by WES and WGS, with a much lower quality of the WES variants located in those additional regions.

Matched and mismatched genotype statistics, analyses of variant coverage depth (CD), i.e. the number of reads passing quality control used to calculate the genotype at a specific site in a specific sample, genotype quality (GQ), i.e. a phred-scaled value representing the confidence that the called genotype is the true genotype, and minor read ratio (MRR), i.e. the ratio of reads for the less covered allele (reference or variant allele) over the total number of reads covering the position where the variant was called, were performed using a homemade R software script (31).

We then filtered out variants with a  $CD < 8$  or  $GQ < 20$  or  $MRR < 20\%$  as suggested in (17) using a homemade script. We used the Annovar tool (18) to annotate high quality (HQ) variants that were detected exclusively by one method. We checked manually some HQ coding variants detected exclusively by WES or WGS using the Integrative Genomics Viewer (IGV) (19), and we observed that some HQ coding WES exclusive variants, were also present in WGS but miscalled by the UG tool. To recall the UG miscalled SNVs, we used the GATK haplotype caller tool (HC) (14). Indels and SNVs were called simultaneously on 6 WES and 6 WGS, and SNV calls were extracted. The same DP, GQ and MRR filters were applied, and we used Annovar to annotate the HQ resulting variants. All scripts are available on [https://github.com/HGID/WES\\_vs\\_WGS](https://github.com/HGID/WES_vs_WGS).

### **Sanger sequencing:**

We randomly selected variants detected exclusively by WES or WGS to test them by Sanger sequencing. We chose more variants in the two categories of WES fully-exclusive and WGS fully-exclusive as we first hypothesized (wrongly) that most, if not all, partly-exclusive variants would be real. We chose less variants in sample S1, as we had few gDNA available for this sample, and we could not test any of the variants in S2 because of absence of remaining gDNA. No other criteria (position, gene, CADD score, frequency) was used for deciding which variants to Sanger sequence. The design of the primers and the sequencing technique are described in **Table S3**.

Analysis of the Sanger sequences was done using the DNASTAR SeqMan Pro software (v11.2.1) using the default settings. To facilitate the localization of the potential variants, we assembled the sequences obtained by Sanger with a 20bp fasta sequence centered on each variant. This sequence was obtained by creating a bed file of the region in the same way as described for the primer design (**Table S3**). Variants where either the forward or reverse sequence did not work were excluded from the analysis and assigned a NA on the Sanger

sequencing results **Table S3**. Sanger sequencing was only attempted once for each variant using the conditions described above.

## Acknowledgements

We would like to thank Vincent Barlogis, Carlos Rodriguez Gallego, Jadranka Pac, and Malgorzata Pac for the recruitment of patients, Fabienne Jabot-Hanin, Maya Chrabieh, and Yelena Nemirovskaya for their invaluable help, and the New York Genome Center for conducting WES and WGS. The Laboratory of Human Genetics of Infectious Diseases is supported by grants from the March of Dimes (1-F12-440), National Center for Research Resources and the National Center for Advancing Sciences (NCATS) of the National Institutes of Health (8UL1TR000043), the St. Giles Foundation, the Rockefeller University, INSERM, and Paris Descartes University.

## References

1. Ng SB, et al. (2009) Targeted capture and massively parallel sequencing of 12 human exomes. *Nature* 461(7261):272–276.
2. Byun M, et al. (2010) Whole-exome sequencing-based discovery of STIM1 deficiency in a child with fatal classic Kaposi sarcoma. *J Exp Med* 207(11):2307–2312.
3. Bolze A, et al. (2010) Whole-exome-sequencing-based discovery of human FADD deficiency. *Am J Hum Genet* 87(6):873–881.
4. Bamshad MJ, et al. (2011) Exome sequencing as a tool for Mendelian disease gene discovery. *Nat Rev Genet* 12(11):745–755.
5. Tennessen JA, et al. (2012) Evolution and functional impact of rare coding variation from deep sequencing of human exomes. *Science* 337(6090):64–69.
6. Bolze A, et al. (2013) Ribosomal protein SA haploinsufficiency in humans with isolated congenital asplenia. *Science* 340(6135):976–978.
7. Koboldt DC, Steinberg KM, Larson DE, Wilson RK, Mardis ER (2013) The next-generation sequencing revolution and its impact on genomics. *Cell* 155(1):27–38.
8. Genome of the Netherlands Consortium, Genome of the Netherlands Consortium (2014) Whole-genome sequence variation, population structure and demographic history of the Dutch population. *Nat Genet* 46(8):818–825.
9. Weaver MJ, et al. (2014) Ordering of mutations in preinvasive disease stages of esophageal carcinogenesis. *Nat Genet* 46(8):837–843.
10. Clark MJ, et al. (2011) Performance comparison of exome DNA sequencing technologies. *Nat Biotechnol* 29(10):908–914.
11. Saunders CJ, et al. (2012) Rapid whole-genome sequencing for genetic disease diagnosis in neonatal intensive care units. *Sci Transl Med* 4(154):154ra135.
12. Meynert AM, Ansari M, FitzPatrick DR, Taylor MS (2014) Variant detection sensitivity and biases in whole genome and exome sequencing. *BMC Bioinformatics* 15:247.
13. DePristo MA, et al. (2011) A framework for variation discovery and genotyping using next-generation DNA sequencing data. *Nat Genet* 43(5):491–498.
14. McKenna A, et al. (2010) The Genome Analysis Toolkit: a MapReduce framework for analyzing next-generation DNA sequencing data. *Genome Res* 20(9):1297–1303.
15. Wang JL, et al. (2010) TGM6 identified as a novel causative gene of spinocerebellar ataxias using exome sequencing. *Brain J Neurol* 133(Pt 12):3510–3518.
16. Choi M, et al. (2009) Genetic diagnosis by whole exome capture and massively parallel DNA sequencing. *Proc Natl Acad Sci U S A* 106(45):19096–19101.
17. Carson AR, et al. (2014) Effective filtering strategies to improve data quality from population-based whole exome sequencing studies. *BMC Bioinformatics* 15:125.

18. Wang K, Li M, Hakonarson H (2010) ANNOVAR: functional annotation of genetic variants from high-throughput sequencing data. *Nucleic Acids Res* 38(16):e164.
19. Thorvaldsdóttir H, Robinson JT, Mesirov JP (2013) Integrative Genomics Viewer (IGV): high-performance genomics data visualization and exploration. *Brief Bioinform* 14(2):178–192.
20. 1000 Genomes Project Consortium, et al. (2012) An integrated map of genetic variation from 1,092 human genomes. *Nature* 491(7422):56–65.
21. Kircher M, et al. (2014) A general framework for estimating the relative pathogenicity of human genetic variants. *Nat Genet* 46(3):310–315.
22. Spier I, et al. (2012) Deep intronic APC mutations explain a substantial proportion of patients with familial or early-onset adenomatous polyposis. *Hum Mutat* 33(7):1045–1050.
23. Kebschull JM, Zador AM (2014) Sources of PCR-induced distortions in high-throughput sequencing datasets. *bioRxiv*:008375.
24. Mahlaoui N, et al. (2011) Isolated congenital asplenia: a French nationwide retrospective survey of 20 cases. *J Pediatr* 158(1):142–148, 148.e1.
25. Li H, Durbin R (2010) Fast and accurate long-read alignment with Burrows-Wheeler transform. *Bioinforma Oxf Engl* 26(5):589–595.
26. Linderman MD, et al. (2014) Analytical validation of whole exome and whole genome sequencing for clinical applications. *BMC Med Genomics* 7:20.
27. Asan null, et al. (2011) Comprehensive comparison of three commercial human whole-exome capture platforms. *Genome Biol* 12(9):R95.
28. Sulonen A-M, et al. (2011) Comparison of solution-based exome capture methods for next generation sequencing. *Genome Biol* 12(9):R94.
29. Wang K, et al. (2011) Exome sequencing identifies frequent mutation of ARID1A in molecular subtypes of gastric cancer. *Nat Genet* 43(12):1219–1223.
30. Szpiech ZA, et al. (2013) Long runs of homozygosity are enriched for deleterious variation. *Am J Hum Genet* 93(1):90–102.
31. R Development Core Team R Development Core Team (2013). R: A language and environment for statistical computing. R Foundation for Statistical Computing, Vienna, Austria. ISBN 3-900051-07-0, URL <http://www.R-project.org>.
32. Altschul SF, Gish W, Miller W, Myers EW, Lipman DJ (1990) Basic local alignment search tool. *J Mol Biol* 215(3):403–410.

**Table 1: Results of Sanger sequencing for 170 WES and WGS fully and partly exclusive variants**

| Type of variant  | Average # per sample (% homozygous) | # successfully sequenced / Total # sequenced | # (%) of real variants | # (%) of homozygous real variants | Estimated # of real variants* | Estimated # of false positives* |
|------------------|-------------------------------------|----------------------------------------------|------------------------|-----------------------------------|-------------------------------|---------------------------------|
| WES              |                                     |                                              |                        |                                   |                               |                                 |
| Fully exclusive  | 64 (0.5%)                           | 44 / 56                                      | 4/44 (9%)              | 0/4 (0%)                          | 6                             | 58                              |
| Partly exclusive | 41 (20%)                            | 21 / 27                                      | 10/21 (48%)            | 3/10 (30%)                        | 20                            | 21                              |
| Total            | 105 (8%)                            | 65 / 83                                      | 14/65 (22%)            |                                   | 26                            | 79                              |
| WGS              |                                     |                                              |                        |                                   |                               |                                 |
| Fully exclusive  | 145 (6%)                            | 52 / 60                                      | 39/52 (75%)†           | 2/39 (5%)                         | 109                           | 36                              |
| Partly exclusive | 547 (44%)                           | 24 / 27                                      | 24/24 (100%)           | 8/24 (33%)                        | 547                           | 0                               |
| Total            | 692 (36%)                           | 76 / 87                                      | 63/76 (83%)            |                                   | 656                           | 36                              |

\* : Estimated numbers of real variants and false positives were computed on the basis of real and false positives proportions applied on the average number of variants per sample

† : 1 real WGS fully exclusive variant was homozygous in Sanger and called heterozygous by WGS

**Table 2: Blast results of WES and WGS fully-exclusive false-positive reads.**

| Origin of false positives * | Variant with reads mapping to a single region † | Variant with reads mapping to more than one region ‡ |
|-----------------------------|-------------------------------------------------|------------------------------------------------------|
| WES                         | 36 (90%)                                        | 4 (10%)                                              |
| WGS                         | 3 (23.1%)                                       | 10 (76.9%)                                           |

\* : All 40 WES and 13 WGS fully exclusive false-positive variants, according to the Sanger result across the 6 samples (**Table 1** and **Table S3**), were aligned using Blast (32) to the reference genome (hg19).

† : Number of variants with all reads mapping to a single region using Blast with default parameters (the threshold for identifying a mapped region is 80% of identities with the blasted sequence).

‡ : Number of variants with all reads mapping to 1) the initial region assigned by the WES or WGS analysis, and 2) at least another region with a higher alignment score (comprised between 95 and 100% of identities).

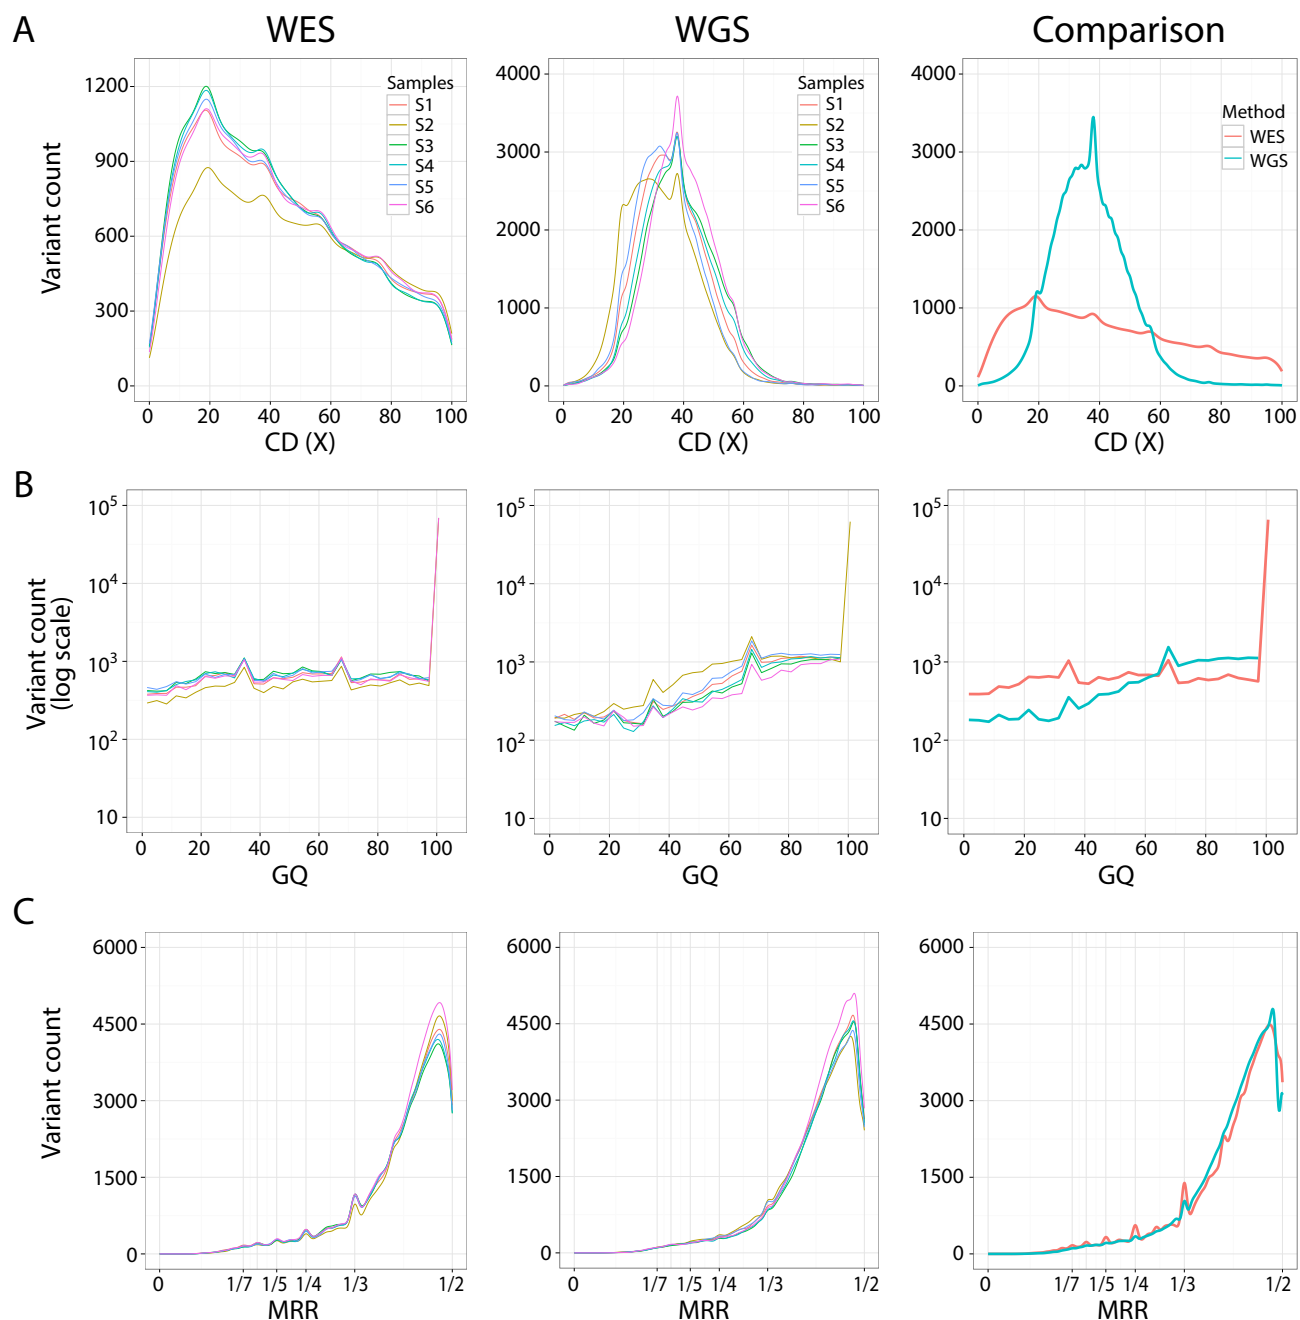

**Figure 1: Distribution of the three main quality parameters for the variants detected by WES or WGS: (A) Coverage depth (CD), (B) genotype quality (GQ) score, and (C) minor read ratio (MRR).** For each of the three parameters, we show: the 6 WES samples (left panel), the 6 WGS samples (middle panel), as well as the average over the 6 WES (red) and the 6 WGS (turquoise) samples (right panel).



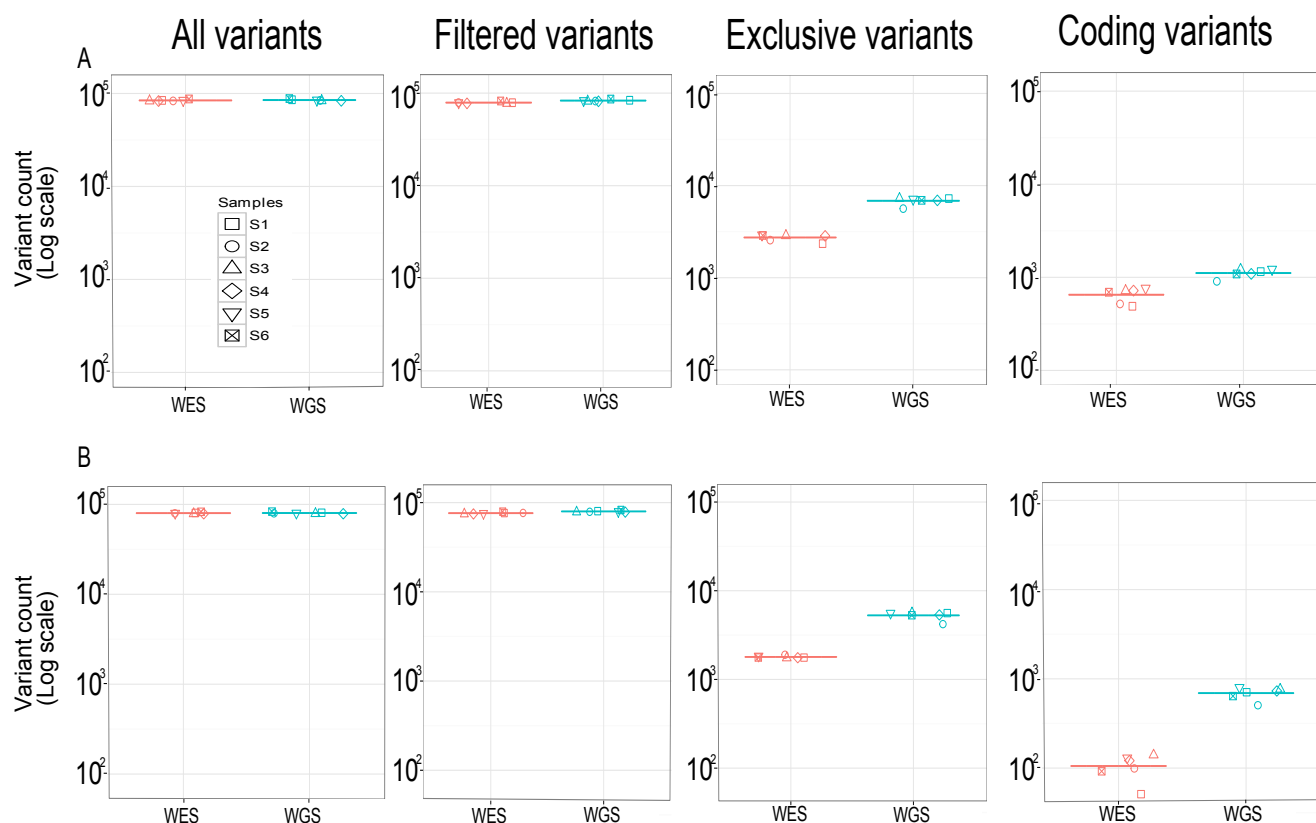

**Figure 2: Numbers of SNVs in each WES or WGS sample following the application of various filters called with: (A) Unified Genotyper, and (B) the combination of Unified Genotyper and Haplotype Caller (bottom panel). For each of the two calling procedures, we show from left to right: Total number of SNVs called by WES (red) or WGS (turquoise) for each sample; Total number of high-quality SNVs satisfying the filtering criteria:  $CD \geq 8X$ ,  $GQ \geq 20$  and  $MRR \geq 0.2$  called by WES (red) or WGS (turquoise) for each sample; Number of high-quality SNVs called by only one method, after filtering: high-quality exclusive WES SNVs (red) and high-quality exclusive WGS SNVs (turquoise); Number of exclusive WES (red) and exclusive WGS (turquoise) high-quality coding SNVs.**

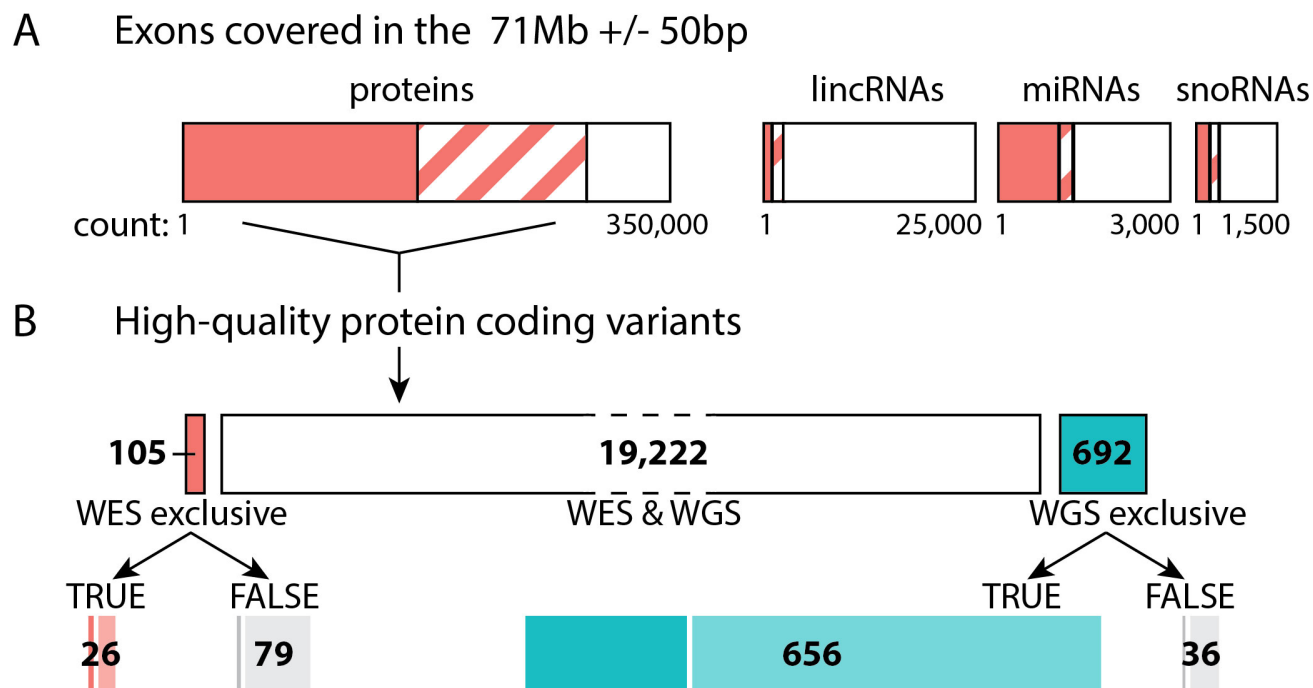

**Figure 3: Diagram of the losses at various levels associated with the use of WES. (A)** Exons that were covered by the Agilent Sure Select Human All Exon kit 71Mb (V4 + UTR) with the 50bps flanking regions. Exons fully covered are represented by boxes filled entirely in red; exons partly covered by boxes filled with red stripes; and exons not covered at all by white boxes. Numbers are shown in **Table S1**. **(B)** Number of high-quality coding variants called by WES and WGS (white box), by WES exclusively (red box), or by WGS exclusively (turquoise box). Details for the variants called exclusively by one method are provided underneath. TRUE: estimate based on variants detected by Sanger sequencing. FALSE: estimate based on variants that were not detected by Sanger sequencing (**Table 1**). Darker boxes (red, gray, or turquoise) represent homozygous variants. Lighter boxes (red, gray, or turquoise) represent heterozygous variants.

## Supporting information

### **Whole-genome sequencing is more powerful than whole-exome sequencing for detecting exome variants**

Aziz Belkadi<sup>a,b,1</sup>, Alexandre Bolze<sup>c,f,1</sup>, Yuval Itan<sup>c</sup>, Quentin B. Vincent<sup>a,b</sup>, Alexander Antipenko<sup>c</sup>, Bertrand Boisson<sup>c</sup>, Jean-Laurent Casanova<sup>a,b,c,d,e,2</sup> and Laurent Abel<sup>a,b,c,2</sup>

<sup>a</sup> Laboratory of Human Genetics of Infectious Diseases, Necker Branch, INSERM U1163, Paris, France, EU

<sup>b</sup> Paris Descartes University, Imagine Institute, Paris, France, EU

<sup>c</sup> St. Giles Laboratory of Human Genetics of Infectious Diseases, Rockefeller Branch, the Rockefeller University, New York, NY, USA

<sup>d</sup> Howard Hughes Medical Institute, New York, NY, USA

<sup>e</sup> Pediatric Hematology-Immunology Unit, Necker Hospital for Sick Children, Paris, France, EU

<sup>f</sup> Present address: Department of Cellular and Molecular Pharmacology, California Institute for Quantitative Biomedical Research, University of California, San Francisco, CA, USA

<sup>1,2</sup> Equal contributions

Corresponding authors: Jean-Laurent Casanova ([casanova@rockefeller.edu](mailto:casanova@rockefeller.edu)) or Laurent Abel ([laurent.abel@inserm.fr](mailto:laurent.abel@inserm.fr))

## **Supplementary text:**

### ***Sanger sequencing methods***

Design of the primers: The first step was to create a bed file with each row representing a region of 400bp centered on the variants chosen for Sanger sequencing. The bed file was then uploaded in the UCSC genome browser using the ‘add custom tracks’ tab. The reference genome assembly used was GRCh37/hg19 (<https://genome.ucsc.edu/cgi-bin/hgGateway>). Fasta files with the sequence for each region were then downloaded from the UCSC website, and uploaded to BatchPrimer3 v1.0 (<http://batchprimer3.bioinformatics.ucdavis.edu/cgi-bin/batchprimer3/batchprimer3.cgi>) (1). We noticed that BatchPrimer3 worked better if the fasta files were copied and pasted rather uploaded using a link. We then requested for Sequencing primers using the following parameters: nb of return = 1 (1 towards 3’, and 1 towards 5’); sequencing start = -1; primer size: Min = 18, Opt = 22, Max = 25; primer Tm: Min = 55, Opt = 58, Max = 62; Max self complementarity = 8; Max 3’ self complementarity = 3. Lastly, variants for which one of the two primers was closer to 60bp to the variant were excluded from further sequencing and analysis. M13F or M13R sequences were added at the 5’-end of the forward or reverse primers. The full list of primers ordered is available at Table S3.

Sequencing of the variants: Amplification of the variants was performed using per reaction: H<sub>2</sub>O=11.5uL, 40% glycerol=4.5uL, 10X buffer (Denville without MgCl<sub>2</sub>)=2.25uL, MgCl<sub>2</sub> (25mM)=0.9uL, dNTP (10mM)=0.225uL, primers (10uM)=0.5uL each, Taq Polymerase (Denville, #CB4050-2)=0.5uL, DNA=50-100ng. DNA was substituted by H<sub>2</sub>O in negative controls. 38 cycles of 94C (30’’), 60C (30’’), 72C (1’) were performed on a Veriti Thermal Cycler (Life Technologies). Sequencing PCR was done using the Big Dye 1.1 (Life Technologies) protocol with 1 uL of amplification PCR product and either the M13F or the M13R primer on a Veriti Thermal Cycler (Life Technologies). Lastly the samples were sequenced on a ABI 3730 XL sequencer (Life Technologies).

## **Supplementary material:**

5 supplementary figures

5 supplementary tables

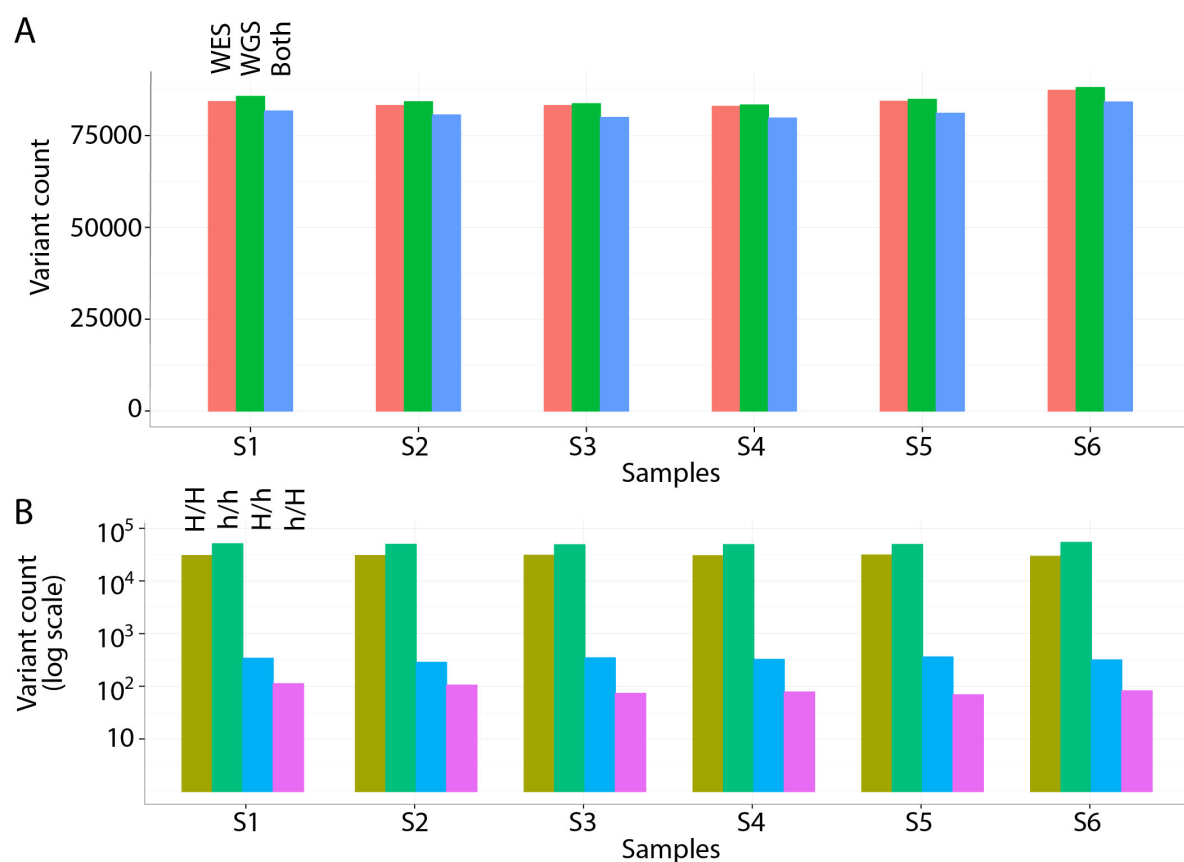

**Figure S1: Number and general characteristics of single-nucleotide variants (SNVs) called by WES and WGS. (A)** Total number of SNVs called by WES alone, WGS alone, and both platforms. **(B)** Characteristics of the SNVs called by both WES and WGS for each sample with four columns indicating the number of SNVs called homozygous by both methods (H/H, light green), called heterozygous by both methods (h/h, dark green), called homozygous by WES and heterozygous by WGS (H/h, blue), called heterozygous by WES and homozygous by WGS (h/H, purple)

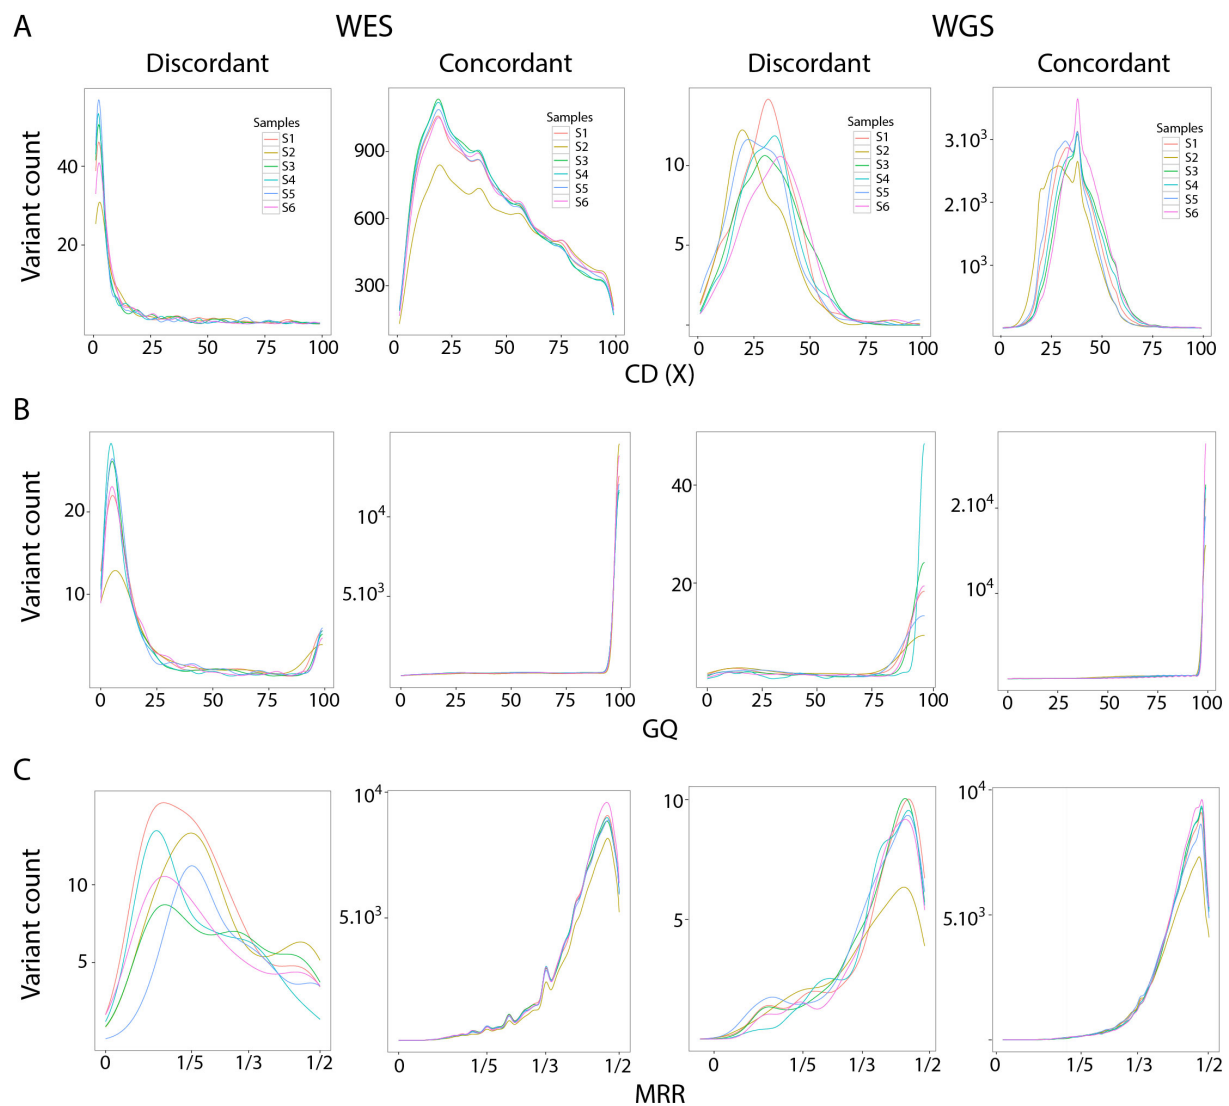

**Figure S2: Distribution of the three main quality parameters for the variants with genotypes discordant between WES and WGS.** (A) Coverage depth (CD), (B) genotype quality (GQ) score, and (C) minor read ratio (MRR). For each of the three parameters, four panels are shown: the two panels on the left show the characteristics of discordant and concordant SNVs in WES samples; the two panels on the right shown the characteristics of discordant and concordant SNVs in WGS samples.

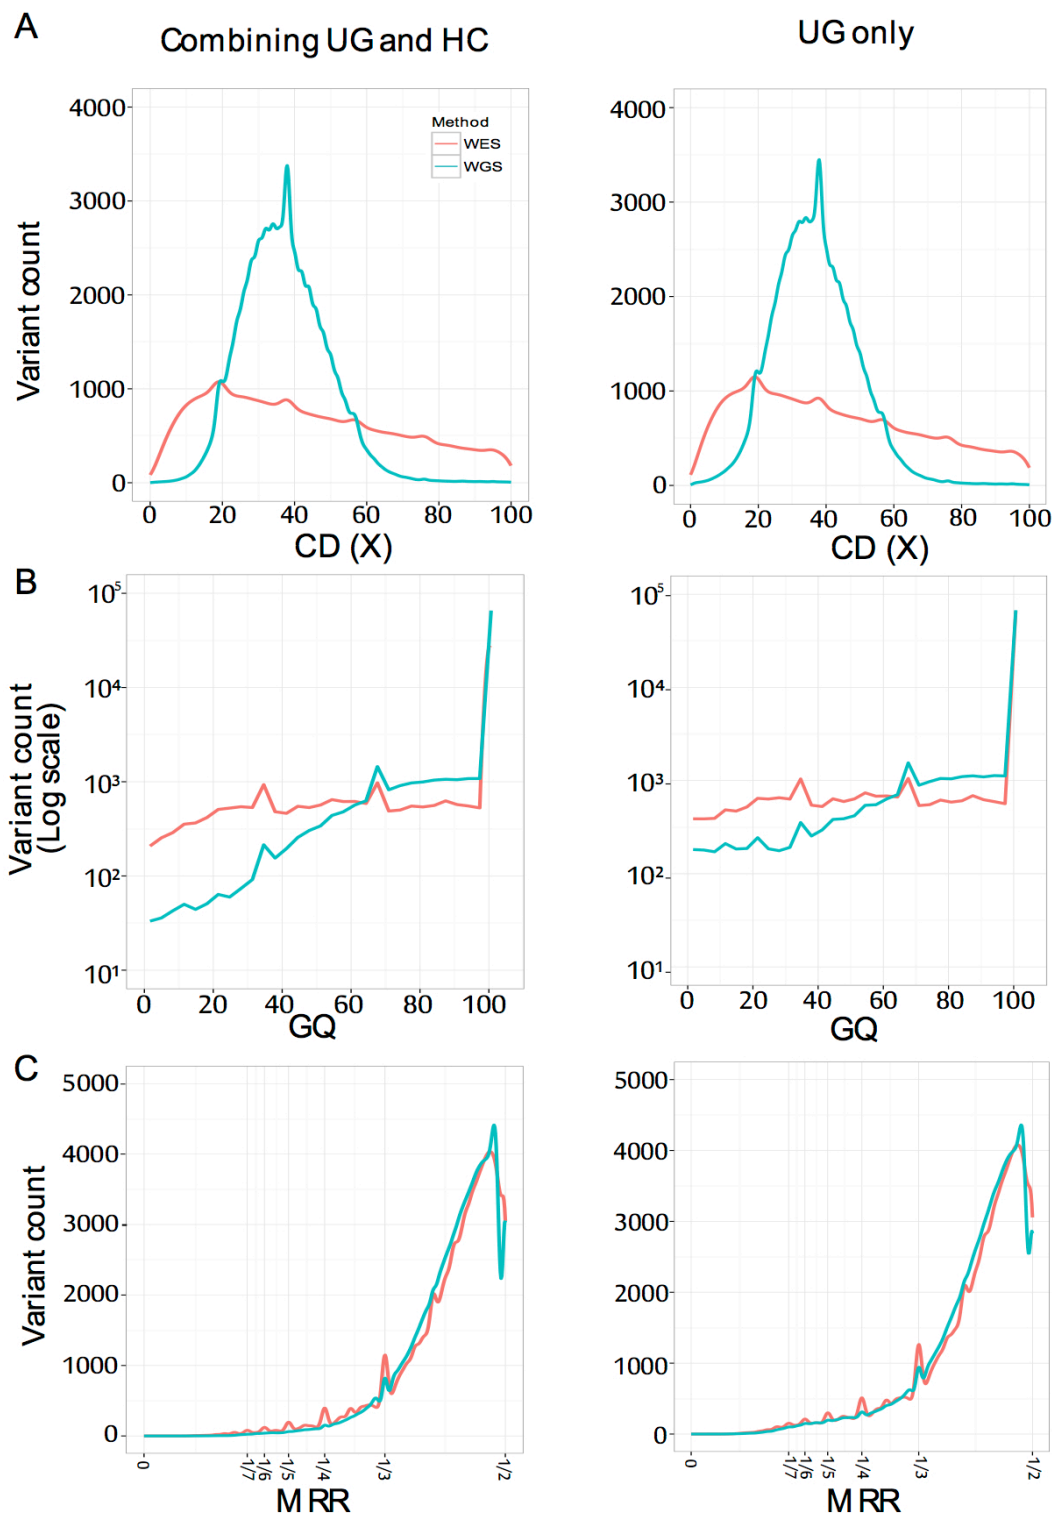

**Figure S3: Comparison of the distribution of the three main quality parameters for the variants detected by WES or WGS, with either the combination of Unified Genotyper and Haplotype Caller, or with Unified Genotyper alone. (A) Coverage depth (CD), (B) genotype quality (GQ) score, and (C) minor read ratio (MRR). For each of the three parameters we show: the average over the 6 WES (red) and the 6 WGS (turquoise) samples for the combination of callers (left panel), and for Unified Genotyper alone (right panel).**



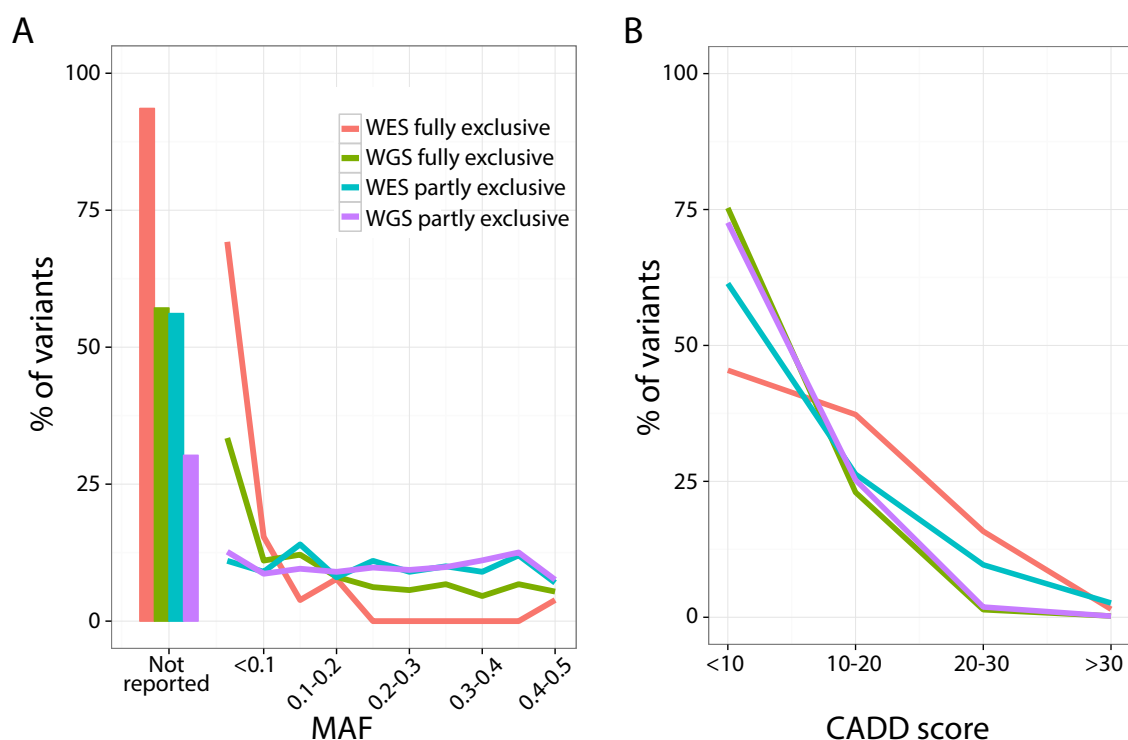

**Figure S4: Distribution of high-quality coding SNVs identified exclusively by one technique according to: (A) their presence in the 1000 Genomes database, and their reported minor allele frequency (MAF) for those present in this database, (B) their CADD (combined annotation-dependent depletion) scores. Red: Fully exclusive high-quality WES coding SNVs, never identified by WGS. Turquoise: Partly exclusive high-quality WES coding SNVs, identified by WGS but filtered out due to their poor quality. Green: Fully exclusive high-quality WES coding SNVs, never called by WES. Purple: Partly exclusive high-quality WGS coding SNVs, identified by WES but filtered out due to their poor quality.**

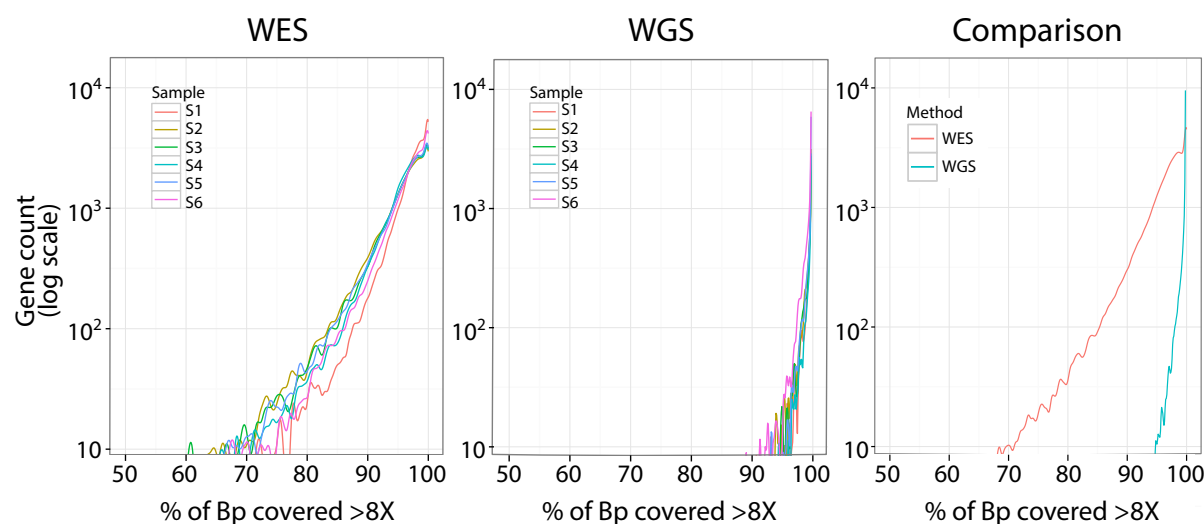

**Figure S5: Distribution of the percentage of base pairs per gene with less than 8X coverage, for all genes in WES and WGS.** Y-axis: number of genes (log-scale). X-axis: Percentage of base pairs for a given gene with at least 8X coverage. The figure shows data for the 6 WES samples (left panel), the 6 WGS samples (middle panel), and the average over the 6 WES (red), and the 6 WGS (turquoise) samples (right panel).

**Table S1: Specific regions of the genome covered by WES using the 71Mb kit.**

|                    | Protein coding exons |                | lincRNA |                | MiRNA |                | snoRNA |                |
|--------------------|----------------------|----------------|---------|----------------|-------|----------------|--------|----------------|
|                    | 71Mb                 | 71Mb +/- 50Bps | 71Mb    | 71Mb +/- 50Bps | 71Mb  | 71Mb +/- 50Bps | 71Mb   | 71Mb +/- 50Bps |
| Fully included     | 88,722               | 180,830        | 387     | 554            | 713   | 1,171          | 169    | 252            |
| Partially included | 219,328              | 129,946        | 965     | 855            | 508   | 94             | 130    | 93             |
| Fully excluded     | 67,647               | 64,921         | 25,446  | 25,389         | 1,826 | 1,782          | 1,157  | 1,111          |
| Total              | 375,697              | 375,697        | 26,798  | 26,798         | 3,047 | 3,047          | 1,456  | 1,456          |

Four types of genomic units were analyzed: protein-coding exons, miRNA exons, snoRNA exons, and lincRNA exons as defined in Ensembl Biomart (2) . We determined the number of these units using the R Biomart package (3) on the GRCh37/hg19 reference. For the counts, we excluded one of the duplicated units of the same type, or units entirely included in other units of the same type (only the longest unit would be counted in this case). We then determined the number of the remaining units that were fully or partly covered when considering the genomic regions defined by the Agilent Sure Select Human All Exon kit 71Mb (v4 + UTR) with or without the 50 bps flanking regions.

**Table S2: Reads and coverage statistics for each WES and each WGS.**

| Sample | Total number of WES reads | Total number of WGS reads | Number of WES reads aligned in WES regions +/- 50 bps | Number of WGS reads aligned in WES regions +/- 50 bps | WES mean coverage in WES regions +/- 50 bps | WGS mean coverage in WES regions +/- 50 bps |
|--------|---------------------------|---------------------------|-------------------------------------------------------|-------------------------------------------------------|---------------------------------------------|---------------------------------------------|
| S1     | 98,792,738                | 1,370,493,918             | 64,696,895                                            | 34,737,193                                            | 72.1                                        | 38.7                                        |
| S2     | 124,483,242               | 1,303,868,290             | 80,970,674                                            | 31,743,245                                            | 90.3                                        | 35.3                                        |
| S3     | 86,822,862                | 1,477,715,120             | 57,970,027                                            | 37,322,280                                            | 64.5                                        | 41.5                                        |
| S4     | 89,521,104                | 1,438,287,290             | 59,084,117                                            | 36,600,011                                            | 65.9                                        | 40.7                                        |
| S5     | 98,002,162                | 1,301,586,284             | 62,673,065                                            | 33,102,614                                            | 69.9                                        | 36.8                                        |
| S6     | 100,056,600               | 1,445,702,068             | 68,002,983                                            | 37,619,386                                            | 75.8                                        | 41.9                                        |
| Mean   | 99,613,118                | 1,389,608,828             | 65,566,294                                            | 35,187,455                                            | 73.1                                        | 39.2                                        |

**Table S3: Sanger sequencing results.**

| Gene     | Chr | Start     | Ref | Obs | Genotype | Method               | Sample | Sanger result | forward primer                                 | reverse primer                                |
|----------|-----|-----------|-----|-----|----------|----------------------|--------|---------------|------------------------------------------------|-----------------------------------------------|
| CYP26B1  | 2   | 72359518  | A   | G   | het      | WES fully exclusive  | S1     | HET           | TGTAAAACGACGGCCAGTGTG<br>GGTCTTGGGTTAGACTGT    | CAGGAAACAGCTATGACCGTAT<br>AGCATCCGGGACACC     |
| RSPH10B  | 7   | 5997562   | G   | A   | het      | WES fully exclusive  | S1     | NA            | TGTAAAACGACGGCCAGTGCA<br>GTGAGCCAAGATTGC       | CAGGAAACAGCTATGACCATTT<br>CTTCAAAGGAGCTCAAGG  |
| TAS2R19  | 12  | 11174277  | T   | C   | het      | WES fully exclusive  | S1     | HET           | TGTAAAACGACGGCCAGTTGC<br>ACACATATACACCCATAAA   | CAGGAAACAGCTATGACCCTTC<br>CTCATGTTATTGTCATT   |
| ADAMTS18 | 16  | 77334230  | T   | G   | het      | WES fully exclusive  | S1     | WT            | TGTAAAACGACGGCCAGTTCT<br>CATAAAGACAGTTCTTGGG   | CAGGAAACAGCTATGACCCCAA<br>TGTTAAGGTCAAATGTCA  |
| FAM209A  | 20  | 55100005  | T   | C   | het      | WES fully exclusive  | S1     | HET           | TGTAAAACGACGGCCAGTAAA<br>CCCGTCATGAGCAACT      | CAGGAAACAGCTATGACCACTC<br>ACTAGAACATCCGTTTCC  |
| SRMS     | 20  | 62173927  | G   | A   | het      | WES fully exclusive  | S1     | WT            | TGTAAAACGACGGCCAGTCTT<br>GAGGGTTGGACAGCA       | CAGGAAACAGCTATGACCCAGA<br>GCAATGAGCTCCCA      |
| RRP7A    | 22  | 42910165  | C   | T   | het      | WES fully exclusive  | S1     | NA            | TGTAAAACGACGGCCAGTCTT<br>CCTCGACCACCAAGT       | CAGGAAACAGCTATGACCGATG<br>GGATCACCTTCTTG      |
| CXCR7    | 2   | 237489904 | C   | T   | het      | WES partly exclusive | S1     | HET           | TGTAAAACGACGGCCAGTACA<br>GCATCAAGGAGTGGCT      | CAGGAAACAGCTATGACCCATC<br>AGCTCGTACCTGTAGTTG  |
| MYRIP    | 3   | 40251392  | T   | C   | het      | WES partly exclusive | S1     | NA            | TGTAAAACGACGGCCAGTGAA<br>GAGAAAGCAGACCAGGTAA   | CAGGAAACAGCTATGACCTTAC<br>CTTCTCAGCTCTTCCTG   |
| SYNE1    | 6   | 152529260 | G   | A   | het      | WES partly exclusive | S1     | NA            | TGTAAAACGACGGCCAGTGCC<br>TAAGAGGTGTGAGAACA     | CAGGAAACAGCTATGACCGATC<br>ACTTCTCAGGGCTTAGG   |
| EN2      | 7   | 155251433 | C   | T   | het      | WES partly exclusive | S1     | HET           | TGTAAAACGACGGCCAGTAAC<br>TTCTTCATCGACAACATCC   | CAGGAAACAGCTATGACCAGCG<br>AGAGCGTCTTGGAG      |
| MFSD3    | 8   | 145735026 | T   | G   | het      | WES partly exclusive | S1     | WT            | TGTAAAACGACGGCCAGTCCA<br>AGGTTCTGTACGCTCC      | CAGGAAACAGCTATGACCAGG<br>AGCAGAAAGAGTTGCG     |
| CES1     | 16  | 55862717  | T   | C   | het      | WES partly exclusive | S1     | WT            | TGTAAAACGACGGCCAGTACT<br>CCAGAATGCTGTGAGAGTT   | CAGGAAACAGCTATGACCATTT<br>ATTCTCATGTCCAGCAG   |
| CXorf40A | X   | 148628490 | A   | T   | hom      | WES partly exclusive | S1     | HOM           | TGTAAAACGACGGCCAGTCAA<br>TGCCCCGAAGACTTAAC     | CAGGAAACAGCTATGACCTGA<br>GCAAAGGAACCTGTTTAC   |
| AIM1L    | 1   | 26664968  | C   | T   | het      | WGS partly exclusive | S1     | HET           | TGTAAAACGACGGCCAGTACC<br>AGCTACTTGGGACCAG      | CAGGAAACAGCTATGACCCAGC<br>TGCTGTGTGAAATTAGAG  |
| ADCY2    | 5   | 7802363   | C   | T   | het      | WGS partly exclusive | S1     | HET           | TGTAAAACGACGGCCAGTGCC<br>AAGTGGAGTAGGCATTT     | CAGGAAACAGCTATGACCCAGC<br>CACTATCTGAAGTAAC    |
| SOHLH1   | 9   | 138590928 | C   | T   | hom      | WGS partly exclusive | S1     | HOM           | TGTAAAACGACGGCCAGTCAG<br>CCCCGAACATAATCTC      | CAGGAAACAGCTATGACCTCCC<br>TACGTGACCCAGTCT     |
| OR8U1    | 11  | 56143716  | T   | C   | het      | WGS partly exclusive | S1     | NA            | TGTAAAACGACGGCCAGTCAT<br>TCAACTTGTCAGTTCCTTA   | CAGGAAACAGCTATGACCCTTG<br>TCTGTGTCCAGGGC      |
| SPATA5L1 | 15  | 45695382  | G   | A   | het      | WGS partly exclusive | S1     | HET           | TGTAAAACGACGGCCAGTCTG<br>GGAGGTCTTTGCGAG       | CAGGAAACAGCTATGACCGACA<br>CAAGGCGTCCATCTC     |
| GPX4     | 19  | 1106615   | T   | C   | het      | WGS partly exclusive | S1     | HET           | TGTAAAACGACGGCCAGTTAC<br>GGACCCATGGAGGAG       | CAGGAAACAGCTATGACCCAGA<br>AAGATCCAGCAGGCTA    |
| CDKL5    | X   | 18638082  | A   | C   | het      | WGS partly exclusive | S1     | HET           | TGTAAAACGACGGCCAGTGGA<br>ACCTAGTGTGTCATGATTTT  | CAGGAAACAGCTATGACCTAGA<br>AAAGGCTCTGTTGAGAGG  |
| C1orf94  | 1   | 34667784  | A   | C   | het      | WES fully exclusive  | S3     | WT            | TGTAAAACGACGGCCAGTATC<br>CCTAAGGAAGTTGCGAT     | CAGGAAACAGCTATGACCGGA<br>AGGGATTGAGAGGAGTCTA  |
| HMCN1    | 1   | 186052030 | T   | G   | het      | WES fully exclusive  | S3     | NA            | TGTAAAACGACGGCCAGTCTT<br>AATAAAAGCTAGCATCAGCA  | CAGGAAACAGCTATGACCGGG<br>GATTGAATGAGTATAGGCT  |
| DYSF     | 2   | 71791292  | T   | G   | het      | WES fully exclusive  | S3     | NA            | TGTAAAACGACGGCCAGTCTG<br>GTGTGTACCATCCC        | CAGGAAACAGCTATGACCAGAC<br>CTCTTCTCCTTCCAAGAC  |
| ZSWIM2   | 2   | 187692949 | A   | T   | het      | WES fully exclusive  | S3     | WT            | TGTAAAACGACGGCCAGTTGA<br>GACACAGGCTGTCTTGATA   | CAGGAAACAGCTATGACCCACAT<br>TTTCCCAGGTATCTTCAA |
| USP49    | 6   | 41774685  | C   | G   | het      | WES fully exclusive  | S3     | NA            | TGTAAAACGACGGCCAGTAGG<br>TAACAGAACACGTAGAGATCC | CAGGAAACAGCTATGACCGGA<br>GTTGAAATGAATGAATCTA  |
| MACC1    | 7   | 20198700  | G   | T   | het      | WES fully exclusive  | S3     | WT            | TGTAAAACGACGGCCAGTCCA<br>CTTGAACACAAAAATCAA    | CAGGAAACAGCTATGACCTTGG<br>GATTATATCCACAAAACC  |
| ADCY8    | 8   | 131964235 | C   | G   | het      | WES fully exclusive  | S3     | WT            | TGTAAAACGACGGCCAGTGAG<br>AGCACCCAAACACACAT     | CAGGAAACAGCTATGACCAGA<br>GTGCTGGCAAATAATAAG   |
| OR52B2   | 11  | 6190994   | C   | G   | het      | WES fully exclusive  | S3     | WT            | TGTAAAACGACGGCCAGTAAC<br>ATAAGGATGACACAGAGGTG  | CAGGAAACAGCTATGACCTTTG<br>TGCCCCACTGAGATATAC  |
| CAPN5    | 11  | 76796027  | T   | C   | het      | WES fully exclusive  | S3     | WT            | TGTAAAACGACGGCCAGTTTC<br>ACAGGGCACATCAGG       | CAGGAAACAGCTATGACCCACC<br>CTCACTTCTCAGCAG     |

|          |    |           |   |   |     |                     |    |     |                                                  |                                               |
|----------|----|-----------|---|---|-----|---------------------|----|-----|--------------------------------------------------|-----------------------------------------------|
| RASAL1   | 12 | 113543517 | A | C | het | WES fully exclusive | S3 | WT  | TGTAACACGACGGCCAGTGTG<br>CCTGTCCATGTCCTG         | CAGGAACAGCTATGACCCTCT<br>CTTCTCCCATCTCCTAGA   |
| FMN1     | 15 | 33192236  | G | T | het | WES fully exclusive | S3 | NA  | TGTAACACGACGGCCAGTATA<br>TAAATGTTGTTAAGGGGAGGA   | CAGGAACAGCTATGACCTCCC<br>GACAGCCTATTGAGTA     |
| CES1     | 16 | 55862762  | C | G | het | WES fully exclusive | S3 | WT  | TGTAACACGACGGCCAGTTCT<br>TAAGGAGTCCAGAGCAAAG     | CAGGAACAGCTATGACCAAAC<br>TCCACCTGGAATCTGG     |
| AKAP1    | 17 | 55184422  | A | C | het | WES fully exclusive | S3 | WT  | TGTAACACGACGGCCAGTCAG<br>TGAAGAGTTGCCGGA         | CAGGAACAGCTATGACCGACT<br>GGCAGCCTTTCTCC       |
| MUC16    | 19 | 9067022   | T | G | het | WES fully exclusive | S3 | WT  | TGTAACACGACGGCCAGTGGT<br>GTCTTCATCTGTTGTCACT     | CAGGAACAGCTATGACCTCTA<br>CATCACAGGGCACATTTA   |
| FKRP     | 19 | 47259734  | G | C | het | WES fully exclusive | S3 | WT  | TGTAACACGACGGCCAGTGTCT<br>GCAACAAGGAGACCA        | CAGGAACAGCTATGACCGTAC<br>TGCACGCGGAAAAA       |
| SGK2     | 20 | 42204913  | A | C | het | WES fully exclusive | S3 | WT  | TGTAACACGACGGCCAGTCTG<br>TCTCTTCCAGTCTGCC        | CAGGAACAGCTATGACCGTGT<br>TAATGTGCTTCTGAGCTG   |
| PLOD1    | 1  | 12010469  | G | T | het | WGS fully exclusive | S3 | HET | TGTAACACGACGGCCAGTTCC<br>ATTTCAGATGGTG           | CAGGAACAGCTATGACCAGAT<br>TGCACGTCAACAAGG      |
| PLA2R1   | 2  | 160889514 | G | A | het | WGS fully exclusive | S3 | HOM | TGTAACACGACGGCCAGTGTG<br>AGAGTTTTGGGCCATATTA     | CAGGAACAGCTATGACCAAGA<br>CCTGGTTGTTTTAATGG    |
| ZNF717   | 3  | 75786202  | T | C | het | WGS fully exclusive | S3 | WT  | TGTAACACGACGGCCAGTGAG<br>GTGTAGGTTGTGTGTTCAA     | CAGGAACAGCTATGACCTTTA<br>CGATAAGACAGTTCTCACCA |
| ZNF717   | 3  | 75786516  | G | T | het | WGS fully exclusive | S3 | NA  | TGTAACACGACGGCCAGTGCT<br>TCTCAGCTGTGTGAGTTCT     | CAGGAACAGCTATGACCATAC<br>ATCAGAGAACTCACACCG   |
| ATP13A4  | 3  | 193183940 | T | C | het | WGS fully exclusive | S3 | HET | TGTAACACGACGGCCAGTGCC<br>AACATGCACAGTACAAA       | CAGGAACAGCTATGACCCCGT<br>TCCAGCATTTATGTATTT   |
| ADCY2    | 5  | 7802363   | C | T | het | WGS fully exclusive | S3 | HET | TGTAACACGACGGCCAGTGCC<br>AAGTGAGTAGGCATTT        | CAGGAACAGCTATGACCAGGC<br>CACTATCTGAAGTAAC     |
| POMZP3   | 7  | 76240888  | A | G | het | WGS fully exclusive | S3 | HET | TGTAACACGACGGCCAGTATG<br>ACAGCAGGTACCTCAA        | CAGGAACAGCTATGACCCAG<br>ATGAACCTCAACAAGGC     |
| TRAPPC9  | 8  | 140743340 | G | T | het | WGS fully exclusive | S3 | HET | TGTAACACGACGGCCAGTAAA<br>GATGCTACAGGAGGAACAG     | CAGGAACAGCTATGACCGATT<br>CCTGGTGGCTTTGG       |
| PTPLA    | 10 | 17659265  | G | C | het | WGS fully exclusive | S3 | HET | TGTAACACGACGGCCAGTCGA<br>TGTCGTAGAAGGTGAGC       | CAGGAACAGCTATGACCGGTC<br>GGTAGAGCTGGCTG       |
| TMEM80   | 11 | 695842    | G | A | het | WGS fully exclusive | S3 | HET | TGTAACACGACGGCCAGTACG<br>GACTAATCGGGCTC          | CAGGAACAGCTATGACCGCTT<br>CTCGATGGGGTGAC       |
| OR8U1    | 11 | 56143803  | A | G | het | WGS fully exclusive | S3 | WT  | TGTAACACGACGGCCAGTCCA<br>ACATTGTCAACATTTCTA      | CAGGAACAGCTATGACCTCTT<br>TCACCTCTTATTCTGGA    |
| CCDC88B  | 11 | 64124515  | T | C | het | WGS fully exclusive | S3 | HET | TGTAACACGACGGCCAGTGGA<br>CATACCTGAGAACAGCATT     | CAGGAACAGCTATGACCACCG<br>TGGAGGATCTCAGG       |
| HECTD4   | 12 | 112601517 | C | T | het | WGS fully exclusive | S3 | HET | TGTAACACGACGGCCAGTGAT<br>GTCTACCTGAGGAATCG       | CAGGAACAGCTATGACCGAAA<br>GGATGGGATGACCA       |
| PLEKHH1  | 14 | 68024134  | A | T | het | WGS fully exclusive | S3 | HET | TGTAACACGACGGCCAGTTGT<br>GAGTGATGGGAAGACACTA     | CAGGAACAGCTATGACCTTGG<br>CTTCTAATGAGCAGATGT   |
| IRX3     | 16 | 54317628  | G | A | het | WGS fully exclusive | S3 | HET | TGTAACACGACGGCCAGTAGG<br>AGGACTGGTTTATTTCTTTT    | CAGGAACAGCTATGACCTACA<br>GTTAAACCCCAACACACA   |
| MRC2     | 17 | 60769803  | A | G | het | WGS fully exclusive | S3 | HET | TGTAACACGACGGCCAGTCTG<br>GTGGTGGTGCTGATG         | CAGGAACAGCTATGACCAAG<br>GGAGCCTTCCATAG        |
| BPIFB4   | 20 | 31671663  | T | C | het | WGS fully exclusive | S3 | HET | TGTAACACGACGGCCAGTGGA<br>GAAATCCCACCTGGA         | CAGGAACAGCTATGACCCAAG<br>ACCCAAACCATGTAATT    |
| NEFH     | 22 | 29876587  | C | A | het | WGS fully exclusive | S3 | HET | TGTAACACGACGGCCAGTCTG<br>GACACGCTGAGCAAC         | CAGGAACAGCTATGACCTCC<br>AGGCGTAGCTGACC        |
| ARSD     | X  | 2833631   | A | G | het | WGS fully exclusive | S3 | NA  | TGTAACACGACGGCCAGTTCC<br>CAAAGTGCTGGGATTA        | CAGGAACAGCTATGACCTGTG<br>AATAGTGCTGGATGAAC    |
| SLC25A5  | X  | 118603929 | C | T | het | WGS fully exclusive | S3 | WT  | TGTAACACGACGGCCAGTATG<br>TCATCAGATACTTCCAC       | CAGGAACAGCTATGACCAACT<br>TACCCTTTGAGTGTCAT    |
| SPATA21  | 1  | 16730309  | T | G | het | WES fully exclusive | S4 | WT  | TGTAACACGACGGCCAGTCTT<br>TCACTGTGACTAAAAGTCGT    | CAGGAACAGCTATGACCTGT<br>GATGACAGACACCAGG      |
| KPRP     | 1  | 152732950 | A | C | het | WES fully exclusive | S4 | WT  | TGTAACACGACGGCCAGTAGA<br>CCCAGGGCTCCTATG         | CAGGAACAGCTATGACCGGA<br>GGAATCTCAACAGGACAC    |
| CTNNB1   | 3  | 41278119  | C | A | het | WES fully exclusive | S4 | NA  | TGTAACACGACGGCCAGTAAG<br>CTATTGAAGCTGAGGGAG      | CAGGAACAGCTATGACCGGA<br>AACATCAATGCAATGAA     |
| FRYL     | 4  | 48559517  | G | T | het | WES fully exclusive | S4 | WT  | TGTAACACGACGGCCAGTGAA<br>AGATATTTGTTTGGTTATCA    | CAGGAACAGCTATGACCATCC<br>AGACAGCTCACCTG       |
| PGM3     | 6  | 83892687  | C | A | het | WES fully exclusive | S4 | WT  | TGTAACACGACGGCCAGTCAA<br>GATAATTTGTTTCAAGACCA    | CAGGAACAGCTATGACCTAAT<br>GATTGGTTTTTGGCTTC    |
| ATP6V1C1 | 8  | 104078558 | G | T | het | WES fully exclusive | S4 | WT  | TGTAACACGACGGCCAGTTTG<br>AACTTGTAAGGTAAGGGA<br>G | CAGGAACAGCTATGACCTTCT<br>TTCAATCATTTTTTCTGA   |
| ATRNL1   | 10 | 117075090 | T | G | het | WES fully exclusive | S4 | WT  | TGTAACACGACGGCCAGTTGC<br>ATTAACATAGATGACCTTTCA   | CAGGAACAGCTATGACCCCTT<br>AAGCAGAACTGAAATTGTT  |

|          |    |           |   |   |     |                        |    |     |                                                 |                                                |
|----------|----|-----------|---|---|-----|------------------------|----|-----|-------------------------------------------------|------------------------------------------------|
| HECTD4   | 12 | 112605691 | A | C | het | WES fully<br>exclusive | S4 | WT  | TGTAACACGACGCGCCAGTTTT<br>CTGAAACGGTTTGGCT      | CAGGAACAGCTATGACCCTGG<br>GGTGGCTCTTTCTA        |
| GEMIN2   | 14 | 39601190  | G | T | het | WES fully<br>exclusive | S4 | WT  | TGTAACACGACGCGCCAGTTGA<br>GGCTTTCTGTCTATACCC    | CAGGAACAGCTATGACCCCAA<br>TAAATATTCCATGTGTTTTCT |
| CATSPER2 | 15 | 43924422  | T | C | het | WES fully<br>exclusive | S4 | WT  | TGTAACACGACGCGCCAGTCAG<br>AATGTGACATACCAACCA    | CAGGAACAGCTATGACCACAA<br>ATCTAGACGTGCTTTCTG    |
| MYLK3    | 16 | 46744689  | C | A | het | WES fully<br>exclusive | S4 | NA  | TGTAACACGACGCGCCAGTCAT<br>GAGTGACAAGCAATGAAAG   | CAGGAACAGCTATGACCCTTC<br>CTCCCTTAAATGAACACA    |
| CDC37    | 19 | 10506724  | G | C | het | WES fully<br>exclusive | S4 | WT  | TGTAACACGACGCGCCAGTGTC<br>CTGGTTGCAGGCTCT       | CAGGAACAGCTATGACCACGA<br>CTCCCAAGATTGATAG      |
| PLK1S1   | 20 | 21143043  | G | A | het | WES fully<br>exclusive | S4 | WT  | TGTAACACGACGCGCCAGTACT<br>CATTGCTTGGAGATAGGAA   | CAGGAACAGCTATGACCATA<br>AGATCACTACCACCCAGAA    |
| TMEM88B  | 1  | 1361530   | C | T | het | WGS fully<br>exclusive | S4 | HET | TGTAACACGACGCGCCAGTGTG<br>GCTCTGGGACAGACAT      | CAGGAACAGCTATGACCAGG<br>AGCACCAGCAGGAAG        |
| RNF19B   | 1  | 33430102  | T | G | het | WGS fully<br>exclusive | S4 | NA  | TGTAACACGACGCGCCAGTACA<br>GCGGACACTCCACT        | CAGGAACAGCTATGACCGGG<br>CTCCGAGAACGACTC        |
| TMEM87B  | 2  | 112813190 | G | C | het | WGS fully<br>exclusive | S4 | WT  | TGTAACACGACGCGCCAGTGTT<br>TCCAGAACTGCACG        | CAGGAACAGCTATGACCGGTC<br>CCGACACTCCACTTA       |
| BOC      | 3  | 113004240 | C | T | het | WGS fully<br>exclusive | S4 | HET | TGTAACACGACGCGCCAGTGTG<br>TGGTACCTCTTGATGTTCA   | CAGGAACAGCTATGACCCTCC<br>TGGAACCACTGAG         |
| SRD5A1   | 5  | 6651970   | A | G | het | WGS fully<br>exclusive | S4 | HET | TGTAACACGACGCGCCAGTAAA<br>TCAAAATCCACTTTAGCTTAG | CAGGAACAGCTATGACCAAG<br>CAATGATGTGAACCAAGG     |
| FBXW11   | 5  | 171295669 | G | C | het | WGS fully<br>exclusive | S4 | HET | TGTAACACGACGCGCCAGTTGA<br>ACTCTGCAAAAGTTGACAC   | CAGGAACAGCTATGACCGTGA<br>GATATCAGGGGCTGTA      |
| KCTD7    | 7  | 66098384  | G | A | het | WGS fully<br>exclusive | S4 | HET | TGTAACACGACGCGCCAGTGGA<br>TTGAAGATGGAGCAGC      | CAGGAACAGCTATGACCTGA<br>TCTCTTCAATAAACCCATT    |
| SNTB1    | 8  | 121824063 | C | A | het | WGS fully<br>exclusive | S4 | HET | TGTAACACGACGCGCCAGTCAG<br>AACGAGCCATTGGTG       | CAGGAACAGCTATGACCGACG<br>CACTCTCCTCGCTC        |
| AQP7     | 9  | 33385712  | G | A | het | WGS fully<br>exclusive | S4 | HET | TGTAACACGACGCGCCAGTCAC<br>CCCTCAACACACAGG       | CAGGAACAGCTATGACCCACA<br>GCATCTGCTCCTCAG       |
| OR8U1    | 11 | 56143795  | G | A | het | WGS fully<br>exclusive | S4 | WT  | TGTAACACGACGCGCCAGTCCA<br>ACATTGTCAACATTCTCTA   | CAGGAACAGCTATGACCACCT<br>CCTTATTCTGGAGGCTAT    |
| TREH     | 11 | 118529127 | G | A | het | WGS fully<br>exclusive | S4 | NA  | TGTAACACGACGCGCCAGTGAA<br>TGCTGCAGAGGTTTAATG    | CAGGAACAGCTATGACCTCAG<br>TGTGCTCACTGCAT        |
| LRRC16B  | 14 | 24534337  | C | A | het | WGS fully<br>exclusive | S4 | HET | TGTAACACGACGCGCCAGTGTT<br>GCTAACTTACCCGATTCT    | CAGGAACAGCTATGACCAGG<br>AAAAGGGGAAGACACAG      |
| GALK2    | 15 | 49620200  | C | T | het | WGS fully<br>exclusive | S4 | HET | TGTAACACGACGCGCCAGTGTC<br>CTAAATGTTTGATGACACC   | CAGGAACAGCTATGACCAAGT<br>GCCCTAAGTAGTTCTCTCA   |
| ADCY9    | 16 | 4165432   | T | C | hom | WGS fully<br>exclusive | S4 | HOM | TGTAACACGACGCGCCAGTGCA<br>GTAGAGGAGATGCTGTAT    | CAGGAACAGCTATGACCAACC<br>ACAGGAACAGATGGTG      |
| C17orf96 | 17 | 36830108  | T | G | het | WGS fully<br>exclusive | S4 | WT  | TGTAACACGACGCGCCAGTACT<br>CGGAGTGTTCAAGGC       | CAGGAACAGCTATGACCAATC<br>TACGACCAGCTTCGC       |
| LRRC45   | 17 | 79983379  | C | T | het | WGS fully<br>exclusive | S4 | HET | TGTAACACGACGCGCCAGTGTC<br>CATTCTGTCTGGTGACTAC   | CAGGAACAGCTATGACCGACA<br>GTGCCATGTGTGG         |
| MED16    | 19 | 875395    | C | T | het | WGS fully<br>exclusive | S4 | HET | TGTAACACGACGCGCCAGTATC<br>TTGGTGAGATCTCGGT      | CAGGAACAGCTATGACCGTCA<br>GAGTGAATGCTCTTCT      |
| GIPC1    | 19 | 14590236  | C | T | het | WGS fully<br>exclusive | S4 | NA  | TGTAACACGACGCGCCAGTCCA<br>GCTACTTGGGAGGCT       | CAGGAACAGCTATGACCAAG<br>CCAGGAAGGACAAGTT       |
| CCDC61   | 19 | 46518651  | A | G | het | WGS fully<br>exclusive | S4 | HET | TGTAACACGACGCGCCAGTGTC<br>TGCGCAAGGAGGTGA       | CAGGAACAGCTATGACCCTTA<br>GGCTCCGCTCATC         |
| HELZ2    | 20 | 62190641  | G | A | het | WGS fully<br>exclusive | S4 | HET | TGTAACACGACGCGCCAGTCTC<br>CAAGTCCACCACTTC       | CAGGAACAGCTATGACCCACC<br>TGACCCTGACTGACTC      |
| IRF6     | 1  | 209961970 | C | G | het | WES fully<br>exclusive | S5 | WT  | TGTAACACGACGCGCCAGTCTC<br>TCCTGGGTTTGAAGGAT     | CAGGAACAGCTATGACCCAGA<br>AGGATGGTCCAGAGAGAT    |
| SNRK     | 3  | 43389767  | G | T | het | WES fully<br>exclusive | S5 | WT  | TGTAACACGACGCGCCAGTCCC<br>ACCAATACATCGGGTA      | CAGGAACAGCTATGACCGTAG<br>CTGCAGCACGTTATTTT     |
| PIM1     | 6  | 37139029  | C | G | het | WES fully<br>exclusive | S5 | NA  | TGTAACACGACGCGCCAGTATG<br>AGTGGGTGGGTGAG        | CAGGAACAGCTATGACCCCGA<br>AGTGCATGAGCTTG        |
| STK3     | 8  | 99719384  | A | C | het | WES fully<br>exclusive | S5 | WT  | TGTAACACGACGCGCCAGTCAA<br>ATTGGCTCAATTATGGTT    | CAGGAACAGCTATGACCCGTG<br>GCATTTTAATTATGGTTT    |
| DERA     | 12 | 16109969  | T | G | het | WES fully<br>exclusive | S5 | WT  | TGTAACACGACGCGCCAGTCTC<br>TTCAAGGACCATGTAAAAAT  | CAGGAACAGCTATGACCGGAT<br>AAATGTGTTATCTTCTCCAA  |
| ELMSAN1  | 14 | 74194213  | T | G | het | WES fully<br>exclusive | S5 | WT  | TGTAACACGACGCGCCAGTCCA<br>CATACGAAGCTCAAGGA     | CAGGAACAGCTATGACCGTTT<br>TCGTAGGTGACAGGCT      |
| CES1     | 16 | 55862791  | T | C | het | WES fully<br>exclusive | S5 | WT  | TGTAACACGACGCGCCAGTGAC<br>TGCTTGACTCTTCTCT      | CAGGAACAGCTATGACCAAG<br>GTCACCTACTAGAAAGCG     |
| TBX21    | 17 | 45820022  | A | C | het | WES fully<br>exclusive | S5 | WT  | TGTAACACGACGCGCCAGTAAA<br>CTCCCTAAACACCTTCCAG   | CAGGAACAGCTATGACCTCTA<br>GGAATTAGGGGTAGGGG     |
| CATSPERG | 19 | 38851455  | A | C | het | WES fully              | S5 | WT  | TGTAACACGACGCGCCAGTCTC                          | CAGGAACAGCTATGACCCTCC                          |



|          |    |           |   |   |     |                         |    |     |                                                    |                                              |
|----------|----|-----------|---|---|-----|-------------------------|----|-----|----------------------------------------------------|----------------------------------------------|
|          |    |           |   |   |     | exclusive               |    |     | CTTCTACGAAGACAGCAAA                                | TCTGAGCTTCATAAGTG                            |
| STARD8   | X  | 67940201  | G | C | het | WES fully<br>exclusive  | S5 | WT  | TGTAACACGACGGCCAGTCAC<br>CCCACCTGATCCTCT           | CAGGAACAGCTATGACCGGA<br>AGGCCAGAGCAGTTC      |
| PDE4DIP  | 1  | 144921924 | G | A | het | WES partly<br>exclusive | S5 | NA  | TGTAACACGACGGCCAGTATT<br>ATGCAACTGACTCAAGGGT       | CAGGAACAGCTATGACCTTAG<br>TCTTTGTGGAGCTCAGT   |
| WDR6     | 3  | 49049501  | T | G | het | WES partly<br>exclusive | S5 | WT  | TGTAACACGACGGCCAGTATG<br>TCTGACTGGATTTGGGAT        | CAGGAACAGCTATGACCCCA<br>CCTTCCAGATACGAA      |
| TBCK     | 4  | 107168386 | T | G | het | WES partly<br>exclusive | S5 | WT  | TGTAACACGACGGCCAGTTTG<br>TTGATAAGTTCAAACTGAAA<br>G | CAGGAACAGCTATGACCAGAC<br>TCTGCAAAAGAGAGCTGTA |
| HLA-DRB5 | 6  | 32489786  | T | G | hom | WES partly<br>exclusive | S5 | NA  | TGTAACACGACGGCCAGTCAC<br>ACACACTCAGATTCCTCA        | CAGGAACAGCTATGACCGACC<br>GGATCCTTCGTGTC      |
| GPRIN2   | 10 | 46999863  | C | G | het | WES partly<br>exclusive | S5 | HET | TGTAACACGACGGCCAGTGCG<br>TCAGTGAGCGAGTCT           | CAGGAACAGCTATGACCATGT<br>CATGCCCTCAGCATC     |
| MUC6     | 11 | 1016928   | C | G | het | WES partly<br>exclusive | S5 | NA  | TGTAACACGACGGCCAGTTTG<br>GAGTCACCAAGGAGGT          | CAGGAACAGCTATGACCAATG<br>ACACCGACCACCACT     |
| IL32     | 16 | 3119304   | A | G | het | WES partly<br>exclusive | S5 | WT  | TGTAACACGACGGCCAGTCAA<br>GGTCATGAGATGGTTCC         | CAGGAACAGCTATGACCACAG<br>CACCAGGTCAGAGC      |
| RAD51C   | 17 | 56774108  | T | G | het | WES partly<br>exclusive | S5 | WT  | TGTAACACGACGGCCAGTTAG<br>ACATTTCTGTTGCCTTG         | CAGGAACAGCTATGACCAATG<br>GAGTGTGCTGAGGTCT    |
| SIRPA    | 20 | 1895796   | T | C | het | WES partly<br>exclusive | S5 | WT  | TGTAACACGACGGCCAGTGCT<br>CAAATGAGATGATACATGC       | CAGGAACAGCTATGACCTGGA<br>AAAGTCCATGTTGTTTCT  |
| SGSM1    | 22 | 25272644  | G | C | het | WES partly<br>exclusive | S5 | WT  | TGTAACACGACGGCCAGTTTG<br>CTCTAGGGTGAGATTTCTG       | CAGGAACAGCTATGACCATTT<br>CATGGCCAGGATTTAAC   |
| KANSL3   | 2  | 97271090  | G | A | het | WGS fully<br>exclusive  | S5 | HET | TGTAACACGACGGCCAGTACT<br>CATGCCAATTTACCCA          | CAGGAACAGCTATGACCATTG<br>TGGAGGATCTCAACTCAG  |
| IL17RB   | 3  | 53892830  | T | C | het | WGS fully<br>exclusive  | S5 | HET | TGTAACACGACGGCCAGTCCA<br>GAAAGAAGGGAAGTTTG         | CAGGAACAGCTATGACCTCAG<br>ATTCTAGGTTCTCTGGGA  |
| ZNF717   | 3  | 75787221  | C | T | het | WGS fully<br>exclusive  | S5 | NA  | TGTAACACGACGGCCAGTCAG<br>TGAAAGGATTTTCCACATT       | CAGGAACAGCTATGACCTGAG<br>TGTGAAAAACCTTTTATC  |
| ZNF717   | 3  | 75788130  | C | T | het | WGS fully<br>exclusive  | S5 | WT  | TGTAACACGACGGCCAGTTGT<br>GTGTGTCTGCTGATGTTTA       | CAGGAACAGCTATGACCAACA<br>GTTCAGGAATGAAGCCT   |
| COL19A1  | 6  | 70851789  | A | G | het | WGS fully<br>exclusive  | S5 | HET | TGTAACACGACGGCCAGTTCA<br>TGTTTTAGAACTCTCCTT        | CAGGAACAGCTATGACCTATA<br>CCTTTAGTCTCTGGGCTTC |
| C11orf16 | 11 | 8953721   | T | C | het | WGS fully<br>exclusive  | S5 | HET | TGTAACACGACGGCCAGTGTG<br>ACAGACCCACACAGATA         | CAGGAACAGCTATGACCTCA<br>GGTAATGTTGGTGCTTAT   |
| C1QTNF9B | 13 | 24468329  | A | G | het | WGS fully<br>exclusive  | S5 | NA  | TGTAACACGACGGCCAGTCCC<br>ATCTGGAGAGTAAGAACTG       | CAGGAACAGCTATGACCAGCT<br>CAGACCCACAGATG      |
| NDUFA7   | 19 | 8376431   | G | A | het | WGS fully<br>exclusive  | S5 | HET | TGTAACACGACGGCCAGTGGA<br>AACATGGTGAGACTCTGT        | CAGGAACAGCTATGACCTGG<br>AACACCTGTCTGTCT      |
| CST7     | 20 | 24939590  | G | C | het | WGS fully<br>exclusive  | S5 | HET | TGTAACACGACGGCCAGTGAA<br>GCATTGCCCAAGAT            | CAGGAACAGCTATGACCGTTA<br>GAGACGTGGTGACGGT    |
| SLC25A5  | X  | 118604428 | T | C | het | WGS fully<br>exclusive  | S5 | WT  | TGTAACACGACGGCCAGTCTT<br>TGTGTACAGATGACGTGTT       | CAGGAACAGCTATGACCCAGT<br>TGTGGAACAGACACAGAT  |
| FBLIM1   | 1  | 16096934  | C | T | hom | WGS partly<br>exclusive | S5 | HOM | TGTAACACGACGGCCAGTGAT<br>TCCTTTTAAATGCTCTCA        | CAGGAACAGCTATGACCTCTA<br>AGTGCTCAGCTCACTGC   |
| SYN2     | 3  | 12046215  | G | C | hom | WGS partly<br>exclusive | S5 | NA  | TGTAACACGACGGCCAGTCAG<br>ATGATGAATCTCTGCG          | CAGGAACAGCTATGACCCGTC<br>TGCTTTACCGCTTG      |
| CLDN24   | 4  | 184242959 | C | G | hom | WGS partly<br>exclusive | S5 | HOM | TGTAACACGACGGCCAGTGAT<br>TTTAGAGGGAAGTGGGTCT       | CAGGAACAGCTATGACCACAA<br>GACGGTTCAGGAGTTCT   |
| PDZD2    | 5  | 32087253  | A | G | het | WGS partly<br>exclusive | S5 | HET | TGTAACACGACGGCCAGTATT<br>ACAAGCATGCGCCAC           | CAGGAACAGCTATGACCGAGC<br>CTGACTGGAGACCTG     |
| HOXA4    | 7  | 27169934  | A | G | hom | WGS partly<br>exclusive | S5 | NA  | TGTAACACGACGGCCAGTGCT<br>GACATGGATCTTCTTCATC       | CAGGAACAGCTATGACCTACC<br>CCTATGGCTACCGC      |
| GRK5     | 10 | 121196335 | G | A | het | WGS partly<br>exclusive | S5 | HET | TGTAACACGACGGCCAGTATG<br>GCACTGTTCTGTGCTC          | CAGGAACAGCTATGACCAGTC<br>TGTCTGACTCTGCATCCT  |
| USP28    | 11 | 113670052 | T | A | hom | WGS partly<br>exclusive | S5 | HOM | TGTAACACGACGGCCAGTCTA<br>ATCCTTTTCCAAAGGTGA        | CAGGAACAGCTATGACCGACC<br>TTTGAGGTTAGGTAAGGG  |
| ITGA5    | 12 | 54799450  | A | G | hom | WGS partly<br>exclusive | S5 | HOM | TGTAACACGACGGCCAGTGAT<br>CATCAGCTCTCAGTCTTT        | CAGGAACAGCTATGACCGATA<br>CCCCCTAACCCAC       |
| PRIMA1   | 14 | 94245649  | A | G | het | WGS partly<br>exclusive | S5 | HET | TGTAACACGACGGCCAGTGGC<br>CTAGGAAACACAAAGAG         | CAGGAACAGCTATGACCACAA<br>CATTGTCCCTTTTGAA    |
| TLL13    | 15 | 90794102  | G | A | het | WGS partly<br>exclusive | S5 | HET | TGTAACACGACGGCCAGTTGA<br>GGAAAAGGAATCTGAGAAG       | CAGGAACAGCTATGACCTGGT<br>TCTGAATTTTGTCTGT    |
| ATAD3A   | 1  | 1452566   | G | A | het | WES fully<br>exclusive  | S6 | HET | TGTAACACGACGGCCAGTCGG<br>TCCACTCAGCAGGAT           | CAGGAACAGCTATGACCGGTC<br>TTCTCTCTCTCAG       |
| ACVR2A   | 2  | 148676144 | A | C | het | WES fully<br>exclusive  | S6 | WT  | TGTAACACGACGGCCAGTACA<br>TATGGCTTTGTCAAGAAC        | CAGGAACAGCTATGACCAAAA<br>TACTTCTGGCCAATCTC   |
| OTUD4    | 4  | 146071820 | G | T | het | WES fully               | S6 | NA  | TGTAACACGACGGCCAGTTTA                              | CAGGAACAGCTATGACCAGTG                        |

|           |    |           |   |   |     |                         |    |     |                                               |                                               |
|-----------|----|-----------|---|---|-----|-------------------------|----|-----|-----------------------------------------------|-----------------------------------------------|
|           |    |           |   |   |     | exclusive               |    |     | CCTTATGATCTGTGAAGGTGT<br>C                    | TCAGGGAAGAAGATGAAA                            |
| FOXK1     | 7  | 4801940   | A | C | het | WES fully<br>exclusive  | S6 | WT  | TGTAAACGACGGCCAGTTAT<br>AGGGGACTTGAAAAAGCA    | CAGGAAACAGCTATGACCCAGG<br>TGACCTCACTCCCC      |
| CRTAC1    | 10 | 99770893  | A | C | het | WES fully<br>exclusive  | S6 | WT  | TGTAAACGACGGCCAGTCTG<br>CAGTAGCAAAAGACAAGGT   | CAGGAAACAGCTATGACCAGG<br>ATGTTACCGTTCCTGCT    |
| AQP2      | 12 | 50344816  | A | C | het | WES fully<br>exclusive  | S6 | WT  | TGTAAACGACGGCCAGTCTC<br>CATAGCCTTCTCCAGG      | CAGGAAACAGCTATGACCGATG<br>GCAAAGTTGTGGCTACT   |
| ERN2      | 16 | 23718102  | T | G | het | WES fully<br>exclusive  | S6 | WT  | TGTAAACGACGGCCAGTAGC<br>TCTATTCTGGCTCCTAGT    | CAGGAAACAGCTATGACCAGCA<br>GAGGCAGGGATCTAAG    |
| RAD51C    | 17 | 56774108  | T | G | het | WES fully<br>exclusive  | S6 | NA  | TGTAAACGACGGCCAGTTAG<br>ACATTTCTGTTGCCTTGG    | CAGGAAACAGCTATGACCAATG<br>GAGTGTGCTGAGGTCT    |
| HIPK4     | 19 | 40895487  | A | G | het | WES fully<br>exclusive  | S6 | WT  | TGTAAACGACGGCCAGTGG<br>GAAAAAGACAAGGAAGTGG    | CAGGAAACAGCTATGACCCAAG<br>AATGACGCCTACCG      |
| LILRB2    | 19 | 54780769  | G | C | het | WES fully<br>exclusive  | S6 | NA  | TGTAAACGACGGCCAGTCCA<br>GTGGTTTGGATTCTCTT     | CAGGAAACAGCTATGACCTCTG<br>AGCGTCAGTTTTTCATC   |
| FLG       | 1  | 152281007 | A | G | het | WES partly<br>exclusive | S6 | NA  | TGTAAACGACGGCCAGTGG<br>GAGGCATCAGACCTTC       | CAGGAAACAGCTATGACCACAC<br>AGTCAGTGTGACGACAG   |
| FANCD2    | 3  | 10088404  | C | T | het | WES partly<br>exclusive | S6 | WT  | TGTAAACGACGGCCAGTTTA<br>ACTGTTTTCTGTTGTGTCAT  | CAGGAAACAGCTATGACCTAAA<br>TAGGATACGGAAGGCCA   |
| TRIP6     | 7  | 100468284 | A | G | het | WES partly<br>exclusive | S6 | HET | TGTAAACGACGGCCAGTGGG<br>GGCTGGGAGACAGAG       | CAGGAAACAGCTATGACCTTTT<br>TAGCACCGTTCTCTCT    |
| OR1L6     | 9  | 125512770 | T | C | hom | WES partly<br>exclusive | S6 | HOM | TGTAAACGACGGCCAGTCTC<br>CCACCTACATTCCCTGT     | CAGGAAACAGCTATGACCGTAC<br>ATAACTGTGGCTACCCG   |
| PPYR1     | 10 | 47086915  | C | T | het | WES partly<br>exclusive | S6 | HET | TGTAAACGACGGCCAGTCCC<br>TCAAGTGATCACTTAGTTCA  | CAGGAAACAGCTATGACCAGTA<br>GTCCATGATGGTGTAGACG |
| SLC22A12  | 11 | 64367862  | T | C | het | WES partly<br>exclusive | S6 | HET | TGTAAACGACGGCCAGTAGC<br>AGATTGTGGGTGTGG       | CAGGAAACAGCTATGACCATGC<br>ATGACATGAACATCTAGG  |
| SKA3      | 13 | 21750538  | G | A | het | WES partly<br>exclusive | S6 | WT  | TGTAAACGACGGCCAGTGTG<br>GGACATACCGTCCACT      | CAGGAAACAGCTATGACCCGAG<br>ATTCAAAGTAGTGGCG    |
| OR4N4     | 15 | 22383064  | C | A | het | WES partly<br>exclusive | S6 | HET | TGTAAACGACGGCCAGTTGT<br>TCAACTGTGATGAACCTTA   | CAGGAAACAGCTATGACCAAG<br>GGCAGATGTAGATGAAGAT  |
| KCNJ12    | 17 | 21319079  | C | A | het | WES partly<br>exclusive | S6 | WT  | TGTAAACGACGGCCAGTGGT<br>ACATGCTGCTCATCTCTC    | CAGGAAACAGCTATGACCACCA<br>ATCATGAAGGAGTCGAT   |
| CXorf40A  | X  | 148628490 | A | T | hom | WES partly<br>exclusive | S6 | HOM | TGTAAACGACGGCCAGTCAA<br>TGCCCCGAAGACTTAAC     | CAGGAAACAGCTATGACCCTGA<br>GCAAAGGAACCTGTTTAC  |
| LOC440563 | 1  | 13183115  | G | A | het | WGS fully<br>exclusive  | S6 | WT  | TGTAAACGACGGCCAGTAAA<br>ATTTGTTGTTAGACAAGCTCC | CAGGAAACAGCTATGACCCCA<br>GATAAACAGAAAGTGGA    |
| SIPA1L2   | 1  | 232539219 | C | T | het | WGS fully<br>exclusive  | S6 | HET | TGTAAACGACGGCCAGTAAG<br>TAGTCCCACTCAGTCCCTT   | CAGGAAACAGCTATGACCTTTA<br>GCTATTGCAATTCACAG   |
| ZNF717    | 3  | 75786620  | G | A | het | WGS fully<br>exclusive  | S6 | WT  | TGTAAACGACGGCCAGTTTT<br>CTCTCTGAGTGAGTCCC     | CAGGAAACAGCTATGACCGAAA<br>AACCTTTTCATCGCAAGT  |
| ZNF717    | 3  | 75788192  | T | C | het | WGS fully<br>exclusive  | S6 | NA  | TGTAAACGACGGCCAGTCTC<br>ACCTGAGTTATCACTTGGAC  | CAGGAAACAGCTATGACCTTTA<br>ATTTGAACTCAAACCATGT |
| GET4      | 7  | 930689    | C | T | het | WGS fully<br>exclusive  | S6 | HET | TGTAAACGACGGCCAGTCCC<br>CTTTCTTTTCTGTGTAT     | CAGGAAACAGCTATGACCTTAT<br>GAAAAATCATGGGTACAG  |
| OR8U1     | 11 | 56143819  | G | C | het | WGS fully<br>exclusive  | S6 | WT  | TGTAAACGACGGCCAGTTCT<br>ATTGTGATGACATGCCTCT   | CAGGAAACAGCTATGACCTCTT<br>CAGAGCTTCTTTACCTC   |
| FRY       | 13 | 32776616  | T | A | het | WGS fully<br>exclusive  | S6 | HET | TGTAAACGACGGCCAGTTGC<br>TCATGAGATATCCAGCTAA   | CAGGAAACAGCTATGACCCGTG<br>CCTGGTCATAACTCTAA   |
| TICRR     | 15 | 90168410  | A | C | het | WGS fully<br>exclusive  | S6 | WT  | TGTAAACGACGGCCAGTACC<br>TAGAGGTTGAGCTGGAG     | CAGGAAACAGCTATGACCCGTG<br>GCCAGTCTTTAATTATGT  |
| FSD1      | 19 | 4322990   | G | A | het | WGS fully<br>exclusive  | S6 | HET | TGTAAACGACGGCCAGTATA<br>GCTGGGAACCTGAGGAGTA   | CAGGAAACAGCTATGACCCAGC<br>ACCTTGACCTTGTG      |
| SLC25A5   | X  | 118604409 | C | T | het | WGS fully<br>exclusive  | S6 | WT  | TGTAAACGACGGCCAGTGAA<br>GCCAAGATCATCCAATG     | CAGGAAACAGCTATGACCAACA<br>GACACAGATGCTATCAACC |
| DTX2      | 7  | 76121509  | C | T | het | WGS partly<br>exclusive | S6 | HET | TGTAAACGACGGCCAGTAGG<br>AAAAACAAACCAAGGC      | CAGGAAACAGCTATGACCAAAG<br>AGGCACTGCTCCCC      |
| SOHLH1    | 9  | 138586966 | G | A | hom | WGS partly<br>exclusive | S6 | HOM | TGTAAACGACGGCCAGTCTT<br>CCAGATGCCGAGAAAAG     | CAGGAAACAGCTATGACCCATC<br>TGACTTCTCTCCAGAAC   |
| LRP4      | 11 | 46898771  | T | C | het | WGS partly<br>exclusive | S6 | HET | TGTAAACGACGGCCAGTTCT<br>CACAAACAAAGAGAGAGTG   | CAGGAAACAGCTATGACCATGA<br>GTTTCAGTTTGCCTGATT  |
| CHGA      | 14 | 93397655  | C | T | het | WGS partly<br>exclusive | S6 | HET | TGTAAACGACGGCCAGTTAA<br>CCCTAATCGTTGTCTGCG    | CAGGAAACAGCTATGACCTGT<br>GGGCTGGGTATT         |
| HYDIN     | 16 | 70883822  | T | C | het | WGS partly<br>exclusive | S6 | HET | TGTAAACGACGGCCAGTCTC<br>TGATTATGAGTTCCAGGTC   | CAGGAAACAGCTATGACCTCTT<br>GCTAGAATATCTGACTCCA |
| MYOM1     | 18 | 3067278   | A | G | het | WGS partly<br>exclusive | S6 | HET | TGTAAACGACGGCCAGTAAA<br>GTGTCATTAGTTGGTGCTTT  | CAGGAAACAGCTATGACCTCA<br>GACGACCACTGCAAC      |
| TMEM86B   | 19 | 55739689  | G | A | het | WGS partly              | S6 | HET | TGTAAACGACGGCCAGTCTG                          | CAGGAAACAGCTATGACCAGAT                        |

|         |    |           |   |   |     |                         |    |     |                                              |                                              |
|---------|----|-----------|---|---|-----|-------------------------|----|-----|----------------------------------------------|----------------------------------------------|
|         |    |           |   |   |     | exclusive               |    |     | GGGCCTCTCTCACAC                              | CTGAGTCCAAGAATGG                             |
| SOGA1   | 20 | 35491551  | A | G | hom | WGS partly<br>exclusive | S6 | HOM | TGTAAACGACGGCCAGTGAC<br>ACCTCCGAGCTGTAT      | CAGGAAACAGCTATGACCCGG<br>AGAGGAAAAAGAGC      |
| SLC16A8 | 22 | 38477930  | G | A | het | WGS partly<br>exclusive | S6 | HET | TGTAAACGACGGCCAGTACT<br>TCGAAGACTGTCCCTCATA  | CAGGAAACAGCTATGACCCGGA<br>GGTGACCTTATTCCTTA  |
| ATP11C  | X  | 138897130 | A | C | hom | WGS partly<br>exclusive | S6 | HOM | TGTAAACGACGGCCAGTCAC<br>TTTAAATGGTGTATTTTACC | CAGGAAACAGCTATGACCTGAA<br>AGTGTGTCTCAGATTTGC |

**Table S4: Genes carrying at least two variants called exclusively by WES and at least 3 variants called exclusively by WGS.**

| WES      |                           |                    | WGS       |                           |                    |
|----------|---------------------------|--------------------|-----------|---------------------------|--------------------|
| Gene     | Samples carrying variants | Number of variants | Gene      | Samples carrying variants | Number of variants |
| HLA-DRB1 | 3                         | 7                  | ZNF717    | 5                         | 54                 |
| CES1     | 4                         | 6                  | OR8U1     | 6                         | 16                 |
| PDE4DIP  | 4                         | 6                  | SLC25A5   | 4                         | 15                 |
| SIRPB1   | 5                         | 5                  | SYN2      | 6                         | 11                 |
| ADAM21   | 2                         | 5                  | MUC5B     | 5                         | 11                 |
| MUC6     | 2                         | 4                  | AQP7      | 6                         | 9                  |
| CEP170   | 4                         | 3                  | TAS2R43   | 3                         | 9                  |
| APOBEC3H | 3                         | 3                  | CROCC     | 6                         | 8                  |
| GPRIN2   | 3                         | 3                  | HLA-DRB1  | 4                         | 8                  |
| ZNF717   | 3                         | 3                  | GRIN3B    | 6                         | 7                  |
| HLA-DQA2 | 2                         | 3                  | OR51A2    | 5                         | 7                  |
| KCNJ12   | 2                         | 3                  | TPSD1     | 3                         | 7                  |
| PLEC     | 2                         | 3                  | LONRF2    | 6                         | 6                  |
| SIRPA    | 2                         | 3                  | FLJ43860  | 5                         | 6                  |
| HLA-A    | 1                         | 3                  | HLA-C     | 4                         | 6                  |
| MUC20    | 1                         | 3                  | GRID2IP   | 6                         | 5                  |
| OR9G1    | 1                         | 3                  | IDUA      | 6                         | 5                  |
| TAS2R43  | 1                         | 3                  | LOC440563 | 6                         | 5                  |
| FAT3     | 4                         | 2                  | PRODH     | 5                         | 5                  |
| HECTD4   | 4                         | 2                  | SELO      | 5                         | 5                  |
| MYLK3    | 4                         | 2                  | HEG1      | 3                         | 5                  |
| ACSM5    | 3                         | 2                  | TAS2R19   | 3                         | 5                  |
| CLIP1    | 3                         | 2                  | ARSD      | 2                         | 5                  |
| DZANK1   | 3                         | 2                  | FBRSL1    | 6                         | 4                  |
| IL31RA   | 3                         | 2                  | KRT83     | 6                         | 4                  |
| IL32     | 3                         | 2                  | SAC3D1    | 6                         | 4                  |
| PNKP     | 3                         | 2                  | TREH      | 6                         | 4                  |
| PPYR1    | 3                         | 2                  | ANKRD24   | 5                         | 4                  |
| SF3B3    | 3                         | 2                  | CPAMD8    | 5                         | 4                  |
| TNC      | 3                         | 2                  | FAM131C   | 5                         | 4                  |
| GBP7     | 2                         | 2                  | ZNF598    | 5                         | 4                  |
| KPRP     | 2                         | 2                  | C2CD2     | 4                         | 4                  |
| MLL3     | 2                         | 2                  | PLCL2     | 4                         | 4                  |
| PCMTD1   | 2                         | 2                  | SEC22B    | 4                         | 4                  |
| PKHD1L1  | 2                         | 2                  | TMEM88B   | 4                         | 4                  |
| SPANXD   | 2                         | 2                  | CPZ       | 3                         | 4                  |
| ZSWIM2   | 2                         | 2                  | HLA-A     | 3                         | 4                  |
| CAPN5    | 1                         | 2                  | LRRN4     | 3                         | 4                  |

|          |   |   |           |   |   |
|----------|---|---|-----------|---|---|
| CATSPER2 | 1 | 2 | MAP2K3    | 3 | 4 |
| CFHR1    | 1 | 2 | OBSCN     | 3 | 4 |
| HLA-DRB5 | 1 | 2 | TTLL1     | 3 | 4 |
| SBSN     | 1 | 2 | IER5      | 2 | 4 |
| TMEM128  | 6 | 1 | LAMA5     | 2 | 4 |
| CXorf40A | 5 | 1 | PABPC3    | 2 | 4 |
| ACVR2A   | 4 | 1 | SYTL1     | 1 | 4 |
| BBS4     | 4 | 1 | BAIAP2L2  | 6 | 3 |
| CCNA1    | 4 | 1 | COL4A1    | 6 | 3 |
| CCNE1    | 4 | 1 | PI4K2B    | 6 | 3 |
| CTNNB1   | 4 | 1 | PKD1L2    | 6 | 3 |
| LGALS3   | 4 | 1 | SNX19     | 6 | 3 |
| MFSD3    | 4 | 1 | SPRN      | 6 | 3 |
| NCF4     | 4 | 1 | WTIP      | 6 | 3 |
| NOTCH1   | 4 | 1 | ALDH4A1   | 5 | 3 |
| OR52B2   | 4 | 1 | ANKS6     | 5 | 3 |
| PGM3     | 4 | 1 | CIT       | 5 | 3 |
| RAD51C   | 4 | 1 | COL22A1   | 5 | 3 |
| RHPN2    | 4 | 1 | GRIN2D    | 5 | 3 |
| SGK2     | 4 | 1 | KALRN     | 5 | 3 |
| ATF7IP   | 3 | 1 | NAV2      | 5 | 3 |
| ATRNL1   | 3 | 1 | NBPF3     | 5 | 3 |
| BCOR     | 3 | 1 | TG        | 5 | 3 |
| C19orf44 | 3 | 1 | ZAN       | 5 | 3 |
| DDX18    | 3 | 1 | DPP3      | 4 | 3 |
| DYSF     | 3 | 1 | FRY       | 4 | 3 |
| FAM135A  | 3 | 1 | HLA-DRB5  | 4 | 3 |
| FMN1     | 3 | 1 | HMMR      | 4 | 3 |
| FRMD4A   | 3 | 1 | KIAA1211  | 4 | 3 |
| FRYL     | 3 | 1 | MRS2      | 4 | 3 |
| HIPK4    | 3 | 1 | PCNT      | 4 | 3 |
| MAP2K3   | 3 | 1 | PKD1L1    | 4 | 3 |
| MDGA2    | 3 | 1 | SOHLH1    | 4 | 3 |
| MITF     | 3 | 1 | TMEM158   | 4 | 3 |
| MUC16    | 3 | 1 | BAHCC1    | 3 | 3 |
| NKX2-8   | 3 | 1 | C8orf73   | 3 | 3 |
| OTUD4    | 3 | 1 | CCDC57    | 3 | 3 |
| OXCT2    | 3 | 1 | CYP2A7    | 3 | 3 |
| SELRC1   | 3 | 1 | DRD4      | 3 | 3 |
| SLC35E2  | 3 | 1 | FHOD3     | 3 | 3 |
| SLC5A12  | 3 | 1 | GAB4      | 3 | 3 |
| SPTA1    | 3 | 1 | LILRB3    | 3 | 3 |
| TICRR    | 3 | 1 | LOC653486 | 3 | 3 |
| UBE2D1   | 3 | 1 | LRP8      | 3 | 3 |
| USH2A    | 3 | 1 | MED16     | 3 | 3 |

|          |   |   |              |   |   |
|----------|---|---|--------------|---|---|
| USP49    | 3 | 1 | MUC12        | 3 | 3 |
| WFDC1    | 3 | 1 | PDE4DIP      | 3 | 3 |
| ADCY8    | 2 | 1 | PILRB        | 3 | 3 |
| AKAP1    | 2 | 1 | SLC16A8      | 3 | 3 |
| ALPPL2   | 2 | 1 | SORT1        | 3 | 3 |
| AQP2     | 2 | 1 | TMED8        | 3 | 3 |
| ATP6V1A  | 2 | 1 | TMEM44       | 3 | 3 |
| BCL9     | 2 | 1 | CCDC61       | 2 | 3 |
| C1orf94  | 2 | 1 | CD200R1      | 2 | 3 |
| C2CD3    | 2 | 1 | CD24         | 2 | 3 |
| C5orf60  | 2 | 1 | GPR31        | 2 | 3 |
| CACNA1S  | 2 | 1 | HLA-DQB1     | 2 | 3 |
| CATSPERG | 2 | 1 | LGALS8       | 2 | 3 |
| CCAR1    | 2 | 1 | MMP20        | 2 | 3 |
| CHRNA4   | 2 | 1 | OR2T4        | 2 | 3 |
| CNTD1    | 2 | 1 | PEX6         | 2 | 3 |
| CRTAC1   | 2 | 1 | PIEZO1       | 2 | 3 |
| CYB561   | 2 | 1 | PPP1R37      | 2 | 3 |
| DERA     | 2 | 1 | PRR5         | 2 | 3 |
| DOCK5    | 2 | 1 | TCF3         | 2 | 3 |
| FAM13A   | 2 | 1 | TMEM86B      | 2 | 3 |
| FAT2     | 2 | 1 | TRIM50       | 2 | 3 |
| FKRP     | 2 | 1 | UHRF1        | 2 | 3 |
| FOXK1    | 2 | 1 | ZFPM1        | 2 | 3 |
| GCGR     | 2 | 1 | CACNA1B      | 1 | 3 |
| GEMIN2   | 2 | 1 | CHGA         | 1 | 3 |
| GPATCH8  | 2 | 1 | GABBR1       | 1 | 3 |
| HMCN1    | 2 | 1 | MUC20        | 1 | 3 |
| HSF4     | 2 | 1 | ZNF700       | 1 | 3 |
| ISYNA1   | 2 | 1 | AMH          | 6 | 2 |
| KCNH6    | 2 | 1 | ATP10B       | 6 | 2 |
| LAT      | 2 | 1 | BCLAF1       | 6 | 2 |
| LCN12    | 2 | 1 | CCT5         | 6 | 2 |
| LDLRAD3  | 2 | 1 | CERS1        | 6 | 2 |
| LYZL2    | 2 | 1 | DNAH17       | 6 | 2 |
| MACC1    | 2 | 1 | EMR1         | 6 | 2 |
| MICAL2   | 2 | 1 | LOC100507462 | 6 | 2 |
| NGLY1    | 2 | 1 | OTUD7A       | 6 | 2 |
| OR1L4    | 2 | 1 | WDR86        | 6 | 2 |
| OR1L6    | 2 | 1 | YBX2         | 6 | 2 |
| PARD3B   | 2 | 1 | ABCC6        | 5 | 2 |
| PHACTR3  | 2 | 1 | ANKLE1       | 5 | 2 |
| PIM1     | 2 | 1 | ANKRD36      | 5 | 2 |
| PLA2R1   | 2 | 1 | ARHGEF10L    | 5 | 2 |
| PLXNA1   | 2 | 1 | ATXN2        | 5 | 2 |

|          |   |   |          |   |   |
|----------|---|---|----------|---|---|
| POU2F2   | 2 | 1 | C2orf72  | 5 | 2 |
| RASAL1   | 2 | 1 | CABP5    | 5 | 2 |
| RRP7A    | 2 | 1 | CCDC175  | 5 | 2 |
| SF3B5    | 2 | 1 | CCDC33   | 5 | 2 |
| SKA3     | 2 | 1 | CTDP1    | 5 | 2 |
| SNRK     | 2 | 1 | EXD3     | 5 | 2 |
| SOGA3    | 2 | 1 | FBP1     | 5 | 2 |
| SPATA21  | 2 | 1 | FPGS     | 5 | 2 |
| SVIL     | 2 | 1 | HCN2     | 5 | 2 |
| TBX21    | 2 | 1 | MFAP2    | 5 | 2 |
| TFAM     | 2 | 1 | NUGGC    | 5 | 2 |
| TNRC6A   | 2 | 1 | PPP1R3G  | 5 | 2 |
| TPST2    | 2 | 1 | SPHK1    | 5 | 2 |
| TRAPPC12 | 2 | 1 | SYNM     | 5 | 2 |
| TSHR     | 2 | 1 | TMEM221  | 5 | 2 |
| ZNF527   | 2 | 1 | TRIM22   | 5 | 2 |
| ZPLD1    | 2 | 1 | WNK2     | 5 | 2 |
|          |   |   | ADAM11   | 4 | 2 |
|          |   |   | AGRN     | 4 | 2 |
|          |   |   | AHNAK2   | 4 | 2 |
|          |   |   | ATP11A   | 4 | 2 |
|          |   |   | CARD14   | 4 | 2 |
|          |   |   | ENPP7    | 4 | 2 |
|          |   |   | GFRA4    | 4 | 2 |
|          |   |   | HOXA4    | 4 | 2 |
|          |   |   | HSPG2    | 4 | 2 |
|          |   |   | HYDIN    | 4 | 2 |
|          |   |   | INCENP   | 4 | 2 |
|          |   |   | IRF2BP2  | 4 | 2 |
|          |   |   | KIAA0284 | 4 | 2 |
|          |   |   | LCN15    | 4 | 2 |
|          |   |   | MEF2D    | 4 | 2 |
|          |   |   | MIDN     | 4 | 2 |
|          |   |   | MYO1C    | 4 | 2 |
|          |   |   | PANX2    | 4 | 2 |
|          |   |   | PLXND1   | 4 | 2 |
|          |   |   | POM121C  | 4 | 2 |
|          |   |   | PRIMA1   | 4 | 2 |
|          |   |   | SYNE3    | 4 | 2 |
|          |   |   | TBKBP1   | 4 | 2 |
|          |   |   | THEM4    | 4 | 2 |
|          |   |   | TMTC1    | 4 | 2 |
|          |   |   | TSPAN11  | 4 | 2 |
|          |   |   | UBR4     | 4 | 2 |
|          |   |   | AGBL1    | 3 | 2 |



|          |   |   |
|----------|---|---|
| ALK      | 3 | 2 |
| ARID3A   | 3 | 2 |
| ASTL     | 3 | 2 |
| ATG2A    | 3 | 2 |
| C6orf10  | 3 | 2 |
| C9orf96  | 3 | 2 |
| CAPN14   | 3 | 2 |
| CAPN9    | 3 | 2 |
| CCDC90A  | 3 | 2 |
| CNTN5    | 3 | 2 |
| CTSF     | 3 | 2 |
| FAM174B  | 3 | 2 |
| FAM59B   | 3 | 2 |
| FBXW8    | 3 | 2 |
| FCGBP    | 3 | 2 |
| FOXD1    | 3 | 2 |
| GATA5    | 3 | 2 |
| HEATR1   | 3 | 2 |
| HID1     | 3 | 2 |
| HIVEP3   | 3 | 2 |
| HMHA1    | 3 | 2 |
| IGDCC4   | 3 | 2 |
| IL17RB   | 3 | 2 |
| ITIH3    | 3 | 2 |
| KIR3DL1  | 3 | 2 |
| LPIN1    | 3 | 2 |
| MEGF6    | 3 | 2 |
| MGAM     | 3 | 2 |
| NAF1     | 3 | 2 |
| PALM     | 3 | 2 |
| PLEKHG4B | 3 | 2 |
| RYK      | 3 | 2 |
| RYR3     | 3 | 2 |
| SCN9A    | 3 | 2 |
| SRD5A1   | 3 | 2 |
| TBC1D22B | 3 | 2 |
| TBC1D2B  | 3 | 2 |
| TGM6     | 3 | 2 |
| TNS1     | 3 | 2 |
| TSPAN10  | 3 | 2 |
| UQCERS1  | 3 | 2 |
| WDR27    | 3 | 2 |
| XPO5     | 3 | 2 |
| XPO7     | 3 | 2 |
| ACAN     | 2 | 2 |

**Table S5: List of 380 genes poorly covered in all 6 WES samples indicating those that are known to be involved in Mendelian diseases (source: OMIM).**

| Associated Gene Name | Chr | Mendelian diseases                                                                                                                                           | WES % of BP coverage > 8X | WGS % of BP coverage > 8X | Description                                                      |
|----------------------|-----|--------------------------------------------------------------------------------------------------------------------------------------------------------------|---------------------------|---------------------------|------------------------------------------------------------------|
| WNT4                 | 1   | 46,XX SEX REVERSAL WITH DYSGENESIS OF KIDNEYS, ADRENALS, AND LUNGS / MAYER-ROKITANSKY-KUSTER-HAUSER SYNDROM / MULLERIAN APLASIA AND HYPERANDROGENISM         | 85.0                      | 99.5                      | wingless-type MMTV integration site family, member 4             |
| HSD11B2              | 16  | APPARENT MINERALOCORTICOID EXCESS; AME                                                                                                                       | 82.5                      | 99.9                      | hydroxysteroid (11-beta) dehydrogenase 2                         |
| IFNGR2               | 21  | ATYPICAL MYCOBACTERIOSIS, FAMILIAL                                                                                                                           | 83.8                      | 100.0                     | interferon gamma receptor 2 (interferon gamma transducer 1)      |
| IL12B                | 5   | ATYPICAL MYCOBACTERIOSIS, FAMILIAL / PSORIASIS SUSCEPTIBILITY 11; PSORS11                                                                                    | 81.3                      | 100.0                     | interleukin 12B                                                  |
| SDHA                 | 5   | CARDIOMYOPATHY, DILATED, 1GG; CMD1GG / LEIGH SYNDROME; LS / MITOCHONDRIAL COMPLEX II DEFICIENCY / PARAGANGLIOMAS 5; PGL5                                     | 67.2                      | 100.0                     | succinate dehydrogenase complex, subunit A, flavoprotein (Fp)    |
| LIM2                 | 19  | CATARACT 19; CTRCT19                                                                                                                                         | 75.8                      | 100.0                     | lens intrinsic membrane protein 2, 19kDa                         |
| SLC6A8               | X   | CEREBRAL CREATINE DEFICIENCY SYNDROME 1; CCD51                                                                                                               | 44.0                      | 96.0                      | solute carrier family 6 (neurotransmitter transporter), member 8 |
| DNAI2                | 17  | CILIARY DYSKINESIA, PRIMARY, 9; CILD9                                                                                                                        | 83.8                      | 100.0                     | dynein, axonemal, intermediate chain 2                           |
| KRT18                | 12  | CIRRHOSIS, FAMILIAL                                                                                                                                          | 77.6                      | 100.0                     | keratin 18                                                       |
| CRLF1                | 19  | COLD-INDUCED SWEATING SYNDROME 1; CISS1                                                                                                                      | 83.6                      | 100.0                     | cytokine receptor-like factor 1                                  |
| GDF1                 | 19  | CONOTRUNCAL HEART MALFORMATIONS; CTHM / RIGHT ATRIAL ISOMERISM; RAI / TETRALOGY OF FALLOT; TOF / TRANSPOSITION OF THE GREAT ARTERIES, DEXTRO-LOOPED 3; DTGA3 | 77.5                      | 98.8                      | growth differentiation factor 1                                  |
| TUBB3                | 16  | CORTICAL DYSPLASIA, COMPLEX, WITH OTHER BRAIN MALFORMATIONS 1; CDCBM1 / FIBROSIS OF EXTRAOCULAR MUSCLES, CONGENITAL, 3A, WITH OR WITHOUT EXTRAOCULAR         | 82.3                      | 100.0                     | tubulin, beta 3 class III                                        |
| TUBB4A               | 19  | DYSTONIA 4, TORSION, AUTOSOMAL DOMINANT; DYT4 / LEUKODYSTROPHY, HYPOMYELINATING, 6; HLD6                                                                     | 77.0                      | 100.0                     | tubulin, beta 4A class IVa                                       |
| EWSR1                | 22  | EWING SARCOMA; ES / HISTIOCYTOMA, ANGIOMATOID FIBROUS                                                                                                        | 84.9                      | 100.0                     | EWS RNA-binding protein 1                                        |
| GGT1                 | 22  | GLUTATHIONURIA                                                                                                                                               | 63.8                      | 100.0                     | gamma-glutamyltransferase 1                                      |
| GK                   | X   | GLYCEROL KINASE DEFICIENCY                                                                                                                                   | 78.1                      | 100.0                     | glycerol kinase                                                  |
| BLOC1S3              | 19  | HERMANSKY-PUDLAK SYNDROME 8; HPS8                                                                                                                            | 72.4                      | 100.0                     | biogenesis of lysosomal organelles complex-1, subunit 3          |
| ACVR2B               | 3   | HETEROTAXY, VISCERAL, 4, AUTOSOMAL; HTX4                                                                                                                     | 83.4                      | 99.7                      | activin A receptor, type IIB                                     |
| HS6ST1               | 2   | HYPOGONADOTROPIC HYPOGONADISM 15 WITH OR WITHOUT ANOSMIA; HH15                                                                                               | 82.1                      | 100.0                     | heparan sulfate 6-O-sulfotransferase 1                           |
| FGF8                 | 10  | HYPOGONADOTROPIC HYPOGONADISM 6 WITH OR WITHOUT ANOSMIA; HH6                                                                                                 | 64.8                      | 100.0                     | fibroblast growth factor 8 (androgen-induced)                    |
| SOX18                | 20  | HYPOTRICHOSIS-LYPHEDEMA-TELANGIECTASIA SYNDROME; HLTS                                                                                                        | 78.5                      | 99.0                      | SRY (sex determining region Y)-box 18                            |
| MGP                  | 12  | KEUTEL SYNDROME                                                                                                                                              | 73.9                      | 100.0                     | matrix Gla protein                                               |
| IMPDH1               | 7   | LEBER CONGENITAL AMAUROSIS 11; LCA11 / RETINITIS PIGMENTOSA 10; RP10                                                                                         | 79.7                      | 99.8                      | IMP (inosine 5'-monophosphate) dehydrogenase 1                   |
| RDH12                | 14  | LEBER CONGENITAL AMAUROSIS 13; LCA13                                                                                                                         | 77.1                      | 100.0                     | retinol dehydrogenase 12 (all-trans/9-cis/11-cis)                |
| NMNAT1               | 1   | LEBER CONGENITAL AMAUROSIS 9; LCA9                                                                                                                           | 85.0                      | 100.0                     | nicotinamide nucleotide adenyltransferase 1                      |

|          |    |                                                                                                                                                                                                                            |      |       |                                                                   |
|----------|----|----------------------------------------------------------------------------------------------------------------------------------------------------------------------------------------------------------------------------|------|-------|-------------------------------------------------------------------|
| SURF1    | 9  | LEIGH SYNDROME; LS                                                                                                                                                                                                         | 80.5 | 99.7  | surfeit 1                                                         |
| PIP5K1C  | 19 | LETHAL CONGENITAL CONTRACTURE SYNDROME 3; LCCS3                                                                                                                                                                            | 82.7 | 100.0 | phosphatidylinositol-4-phosphate 5-kinase, type I, gamma          |
| SNTA1    | 20 | LONG QT SYNDROME 12; LQT12                                                                                                                                                                                                 | 81.5 | 100.0 | syntrophin, alpha 1                                               |
| LHB      | 19 | LUTEINIZING HORMONE, BETA POLYPEPTIDE; LHB                                                                                                                                                                                 | 23.5 | 100.0 | luteinizing hormone beta polypeptide                              |
| DHFR     | 5  | MEGALOBlastic ANEMIA DUE TO DIHYDROFOLATE REDUCTASE DEFICIENCY                                                                                                                                                             | 80.6 | 100.0 | dihydrofolate reductase                                           |
| TSPAN7   | X  | MENTAL RETARDATION, X-LINKED 58; MRX58                                                                                                                                                                                     | 78.9 | 99.3  | tetraspanin 7                                                     |
| SMS      | X  | MENTAL RETARDATION, X-LINKED, SYNDROMIC, SNYDER-ROBINSON TYPE; MRXSSR                                                                                                                                                      | 69.5 | 100.0 | spermine synthase                                                 |
| VSX2     | 14 | MICROPHThALMIA, ISOLATED 2; MCOP2 / MICROPHThALMIA, ISOLATED, WITH COLOBOMA 3; MCOPCB3                                                                                                                                     | 78.4 | 100.0 | visual system homeobox 2                                          |
| KRT83    | 12 | MONILETHRIX                                                                                                                                                                                                                | 82.2 | 100.0 | keratin 83                                                        |
| POMT2    | 14 | MUSCULAR DYSTROPHY-DYSTROGLYCANOPATHY (CONGENITAL WITH BRAIN AND EYE / MUSCULAR DYSTROPHY-DYSTROGLYCANOPATHY (CONGENITAL WITH MENTAL RETARDATION) / MUSCULAR DYSTROPHY-DYSTROGLYCANOPATHY (LIMB-GIRDLE), TYPE C, 2; MDDGC2 | 85.6 | 100.0 | protein-O-mannosyltransferase 2                                   |
| DOK7     | 4  | MYASTHENIA, LIMB-GIRDLE, FAMILIAL                                                                                                                                                                                          | 83.0 | 99.8  | docking protein 7                                                 |
| BANF1    | 11 | NESTOR-GUILLEMO PROGERIA SYNDROME; NGPS                                                                                                                                                                                    | 70.6 | 99.8  | barrier to autointegration factor 1                               |
| REEP1    | 2  | NEURONOPATHY, DISTAL HEREDITARY MOTOR, TYPE VB; HMN5B / SPASTIC PARAPLEGIA 31, AUTOSOMAL DOMINANT; SPG31                                                                                                                   | 84.3 | 100.0 | receptor accessory protein 1                                      |
| NAA10    | X  | OGDEN SYNDROME; OGDNS                                                                                                                                                                                                      | 83.1 | 98.7  | N(alpha)-acetyltransferase 10, NatA catalytic subunit             |
| PPIB     | 15 | OSTEOGENESIS IMPERFECTA, TYPE IX; OI9                                                                                                                                                                                      | 74.2 | 100.0 | peptidylprolyl isomerase B (cyclophilin B)                        |
| SPINK1   | 5  | PANCREATITIS, HEREDITARY; PCTT / TROPICAL CALCIFIC PANCREATITIS                                                                                                                                                            | 80.7 | 100.0 | serine peptidase inhibitor, Kazal type 1                          |
| AMH      | 19 | PERSISTENT MULLERIAN DUCT SYNDROME, TYPES I AND II; PMDS                                                                                                                                                                   | 82.1 | 100.0 | anti-Mullerian hormone                                            |
| PSPH     | 7  | PHOSPHOSERINE PHOSPHATASE DEFICIENCY; PSPHD                                                                                                                                                                                | 72.4 | 100.0 | phosphoserine phosphatase                                         |
| IGFBP7   | 4  | RETINAL ARTERIAL MACROANEURYSM WITH SUPRAVALVULAR PULMONIC STENOSIS;                                                                                                                                                       | 81.4 | 100.0 | insulin-like growth factor binding protein 7                      |
| PRPF31   | 19 | RETINITIS PIGMENTOSA 11; RP11                                                                                                                                                                                              | 84.3 | 100.0 | pre-mRNA processing factor 31                                     |
| RP9      | 7  | RETINITIS PIGMENTOSA 9; RP9                                                                                                                                                                                                | 79.5 | 100.0 | retinitis pigmentosa 9 (autosomal dominant)                       |
| KCNC3    | 19 | SPINOCEREBELLAR ATAXIA 13; SCA13                                                                                                                                                                                           | 77.2 | 97.4  | potassium voltage-gated channel, Shaw-related subfamily, member 3 |
| HES7     | 17 | SPONDYLOCOSTAL DYSOSTOSIS 4, AUTOSOMAL RECESSIVE; SCDO4                                                                                                                                                                    | 66.0 | 100.0 | hes family bHLH transcription factor 7                            |
| DDX11    | 12 | WARSAW BREAKAGE SYNDROME; WABS                                                                                                                                                                                             | 64.3 | 100.0 | DEAD/H (Asp-Glu-Ala-Asp/His) box helicase 11                      |
| MXRA8    | 1  | None                                                                                                                                                                                                                       | 79.8 | 99.4  | matrix-remodelling associated 8                                   |
| ANKRD65  | 1  | None                                                                                                                                                                                                                       | 64.5 | 100.0 | ankyrin repeat domain 65                                          |
| TMEM88B  | 1  | None                                                                                                                                                                                                                       | 34.1 | 97.0  | transmembrane protein 88B                                         |
| C1orf233 | 1  | None                                                                                                                                                                                                                       | 78.1 | 99.7  | chromosome 1 open reading frame 233                               |
| MMP23B   | 1  | None                                                                                                                                                                                                                       | 62.5 | 98.0  | matrix metalloproteinase 23B                                      |
| C1orf86  | 1  | None                                                                                                                                                                                                                       | 84.1 | 97.9  | chromosome 1 open reading frame 86                                |
| GPR153   | 1  | None                                                                                                                                                                                                                       | 85.7 | 100.0 | G protein-coupled receptor 153                                    |
| APITD1   | 1  | None                                                                                                                                                                                                                       | 86.6 | 100.0 | apoptosis-inducing, TAF9-like domain 1                            |

|          |   |      |      |       |                                                                            |
|----------|---|------|------|-------|----------------------------------------------------------------------------|
| PRAMEF1  | 1 | None | 13.5 | 100.0 | PRAME family member 1                                                      |
| FAM131C  | 1 | None | 67.3 | 99.2  | family with sequence similarity 131, member C                              |
| CROCC    | 1 | None | 76.4 | 100.0 | ciliary rootlet coiled-coil, rootletin                                     |
| IGSF21   | 1 | None | 84.1 | 99.2  | immunoglobulin superfamily, member 21                                      |
| AKR7A3   | 1 | None | 78.8 | 100.0 | aldo-keto reductase family 7, member A3 (aflatoxin aldehyde reductase)     |
| AKR7A2   | 1 | None | 80.7 | 100.0 | aldo-keto reductase family 7, member A2 (aflatoxin aldehyde reductase)     |
| CAMK2N1  | 1 | None | 68.6 | 99.6  | calcium/calmodulin-dependent protein kinase II inhibitor 1                 |
| TRNP1    | 1 | None | 73.6 | 100.0 | TMF1-regulated nuclear protein 1                                           |
| RAB42    | 1 | None | 69.8 | 99.8  | RAB42, member RAS oncogene family                                          |
| HDAC1    | 1 | None | 84.4 | 100.0 | histone deacetylase 1                                                      |
| FAM229A  | 1 | None | 79.9 | 100.0 | family with sequence similarity 229, member A                              |
| BMP8A    | 1 | None | 77.6 | 100.0 | bone morphogenetic protein 8a                                              |
| BMP8B    | 1 | None | 84.9 | 100.0 | bone morphogenetic protein 8b                                              |
| YBX1     | 1 | None | 85.1 | 98.9  | Y box binding protein 1                                                    |
| LDLRAD1  | 1 | None | 84.0 | 100.0 | low density lipoprotein receptor class A domain containing 1               |
| SSBP3    | 1 | None | 81.1 | 99.9  | single stranded DNA binding protein 3                                      |
| FAM19A3  | 1 | None | 76.8 | 100.0 | family with sequence similarity 19 (chemokine (C-C motif)-like), member A3 |
| C1orf106 | 1 | None | 82.4 | 100.0 | chromosome 1 open reading frame 106                                        |
| NENF     | 1 | None | 76.0 | 100.0 | neudesin neurotrophic factor                                               |
| ABCB10   | 1 | None | 77.1 | 99.9  | ATP-binding cassette, sub-family B (MDR/TAP), member 10                    |
| OPN3     | 1 | None | 82.4 | 98.4  | opsin 3                                                                    |
| C1orf229 | 1 | None | 70.1 | 100.0 | chromosome 1 open reading frame 229                                        |
| OR2L8    | 1 | None | 2.6  | 100.0 | olfactory receptor, family 2, subfamily L, member 8 (gene/pseudogene)      |
| OR2M3    | 1 | None | 78.3 | 100.0 | olfactory receptor, family 2, subfamily M, member 3                        |
| CYS1     | 2 | None | 79.7 | 100.0 | cystin 1                                                                   |
| PQLC3    | 2 | None | 82.7 | 94.6  | PQ loop repeat containing 3                                                |
| CGREF1   | 2 | None | 83.8 | 100.0 | cell growth regulator with EF-hand domain 1                                |
| MEMO1    | 2 | None | 80.7 | 100.0 | mediator of cell motility 1                                                |
| PKDCC    | 2 | None | 83.3 | 99.5  | protein kinase domain containing, cytoplasmic                              |
| RPS27A   | 2 | None | 82.8 | 100.0 | ribosomal protein S27a                                                     |
| C1D      | 2 | None | 78.3 | 100.0 | C1D nuclear receptor corepressor                                           |
| CD8B     | 2 | None | 65.9 | 100.0 | CD8b molecule                                                              |
| FOXI3    | 2 | None | 79.1 | 100.0 | forkhead box I3                                                            |
| TRIM43B  | 2 | None | 65.6 | 100.0 | tripartite motif containing                                                |

|            |   |      |      |       |                                                                                      |
|------------|---|------|------|-------|--------------------------------------------------------------------------------------|
|            |   |      |      |       | 43B                                                                                  |
| ANKRD36    | 2 | None | 67.6 | 100.0 | ankyrin repeat domain 36                                                             |
| PDCL3      | 2 | None | 76.6 | 100.0 | phosducin-like 3                                                                     |
| POU3F3     | 2 | None | 61.8 | 96.1  | POU class 3 homeobox 3                                                               |
| TMEM37     | 2 | None | 85.2 | 99.9  | transmembrane protein 37                                                             |
| HNRNPA3    | 2 | None | 80.3 | 100.0 | heterogeneous nuclear ribonucleoprotein A3                                           |
| NDUFB3     | 2 | None | 47.5 | 100.0 | NADH dehydrogenase (ubiquinone) 1 beta subcomplex, 3, 12kDa                          |
| CCNYL1     | 2 | None | 84.9 | 100.0 | cyclin Y-like 1                                                                      |
| WNT6       | 2 | None | 78.5 | 100.0 | wingless-type MMTV integration site family, member 6                                 |
| NPPC       | 2 | None | 70.4 | 100.0 | natriuretic peptide C                                                                |
| ASB18      | 2 | None | 80.0 | 99.9  | ankyrin repeat and SOCS box containing 18                                            |
| HES6       | 2 | None | 74.4 | 100.0 | hes family bHLH transcription factor 6                                               |
| PRR21      | 2 | None | 42.3 | 100.0 | proline rich 21                                                                      |
| HIGD1A     | 3 | None | 78.8 | 100.0 | HIG1 hypoxia inducible domain family, member 1A                                      |
| TMEM42     | 3 | None | 82.4 | 100.0 | transmembrane protein 42                                                             |
| MRP63      | 3 | None | 73.6 | 100.0 | -                                                                                    |
| PODXL2     | 3 | None | 85.1 | 100.0 | podocalyxin-like 2                                                                   |
| EFCC1      | 3 | None | 83.7 | 100.0 | EF-hand and coiled-coil domain containing 1                                          |
| RAB43      | 3 | None | 70.9 | 94.8  | RAB43, member RAS oncogene family                                                    |
| CDV3       | 3 | None | 85.2 | 100.0 | CDV3 homolog (mouse)                                                                 |
| CAMK2N2    | 3 | None | 77.4 | 99.3  | calcium/calmodulin-dependent protein kinase II inhibitor 2                           |
| IGF2BP2    | 3 | None | 85.6 | 99.8  | insulin-like growth factor 2 mRNA binding protein 2                                  |
| RPL39L     | 3 | None | 79.8 | 100.0 | ribosomal protein L39-like                                                           |
| MFI2       | 3 | None | 86.6 | 100.0 | antigen p97 (melanoma associated) identified by monoclonal antibodies 133.2 and 96.5 |
| CTBP1      | 4 | None | 79.7 | 99.7  | C-terminal binding protein 1                                                         |
| C4orf48    | 4 | None | 81.0 | 100.0 | chromosome 4 open reading frame 48                                                   |
| ADRA2C     | 4 | None | 77.7 | 100.0 | adrenoceptor alpha 2C                                                                |
| UGT2B28    | 4 | None | 10.1 | 100.0 | UDP glucuronosyltransferase 2 family, polypeptide B28                                |
| OSTC       | 4 | None | 71.5 | 100.0 | oligosaccharyltransferase complex subunit (non-catalytic)                            |
| RPS3A      | 4 | None | 83.2 | 100.0 | ribosomal protein S3A                                                                |
| PRSS48     | 4 | None | 85.4 | 100.0 | protease, serine, 48                                                                 |
| ANKRD33B   | 5 | None | 79.1 | 99.9  | ankyrin repeat domain 33B                                                            |
| FOXD1      | 5 | None | 57.3 | 100.0 | forkhead box D1                                                                      |
| VDAC1      | 5 | None | 77.7 | 100.0 | voltage-dependent anion channel 1                                                    |
| CDKN2AIPNL | 5 | None | 71.4 | 100.0 | CDKN2A interacting protein N-terminal like                                           |
| SAP30L     | 5 | None | 82.5 | 100.0 | SAP30-like                                                                           |

|             |   |      |      |       |                                                                                          |
|-------------|---|------|------|-------|------------------------------------------------------------------------------------------|
| FABP6       | 5 | None | 81.0 | 100.0 | fatty acid binding protein 6, ileal                                                      |
| ATP6V0E1    | 5 | None | 86.3 | 100.0 | ATPase, H <sup>+</sup> transporting, lysosomal 9kDa, V0 subunit e1                       |
| C5orf47     | 5 | None | 77.6 | 100.0 | chromosome 5 open reading frame 47                                                       |
| PRR7        | 5 | None | 83.2 | 100.0 | proline rich 7 (synaptic)                                                                |
| C5orf60     | 5 | None | 79.8 | 100.0 | chromosome 5 open reading frame 60                                                       |
| TUBB2A      | 6 | None | 71.3 | 100.0 | tubulin, beta 2A class IIa                                                               |
| HIST1H2BK   | 6 | None | 49.9 | 100.0 | histone cluster 1, H2bk                                                                  |
| LSM2        | 6 | None | 71.3 | 100.0 | LSM2 homolog, U6 small nuclear RNA associated (S. cerevisiae)                            |
| RPS10-NUDT3 | 6 | None | 73.6 | 100.0 | RPS10-NUDT3 readthrough                                                                  |
| RPL10A      | 6 | None | 73.7 | 100.0 | ribosomal protein L10a                                                                   |
| CLPSL2      | 6 | None | 73.7 | 100.0 | colipase-like 2                                                                          |
| SLC35B2     | 6 | None | 64.9 | 100.0 | solute carrier family 35 (adenosine 3'-phospho 5'-phosphosulfate transporter), member B2 |
| ANKRD66     | 6 | None | 71.3 | 100.0 | ankyrin repeat domain 66                                                                 |
| CD24        | 6 | None | 59.4 | 98.6  | CD24 molecule                                                                            |
| METTL24     | 6 | None | 79.4 | 100.0 | methyltransferase like 24                                                                |
| FAM26F      | 6 | None | 80.7 | 100.0 | family with sequence similarity 26, member F                                             |
| NUS1        | 6 | None | 82.3 | 100.0 | nuclear undecaprenyl pyrophosphate synthase 1 homolog (S. cerevisiae)                    |
| CENPW       | 6 | None | 81.8 | 100.0 | centromere protein W                                                                     |
| PHF10       | 6 | None | 76.8 | 100.0 | PHD finger protein 10                                                                    |
| UNCX        | 7 | None | 70.8 | 99.9  | UNC homeobox                                                                             |
| NUDT1       | 7 | None | 77.0 | 100.0 | nudix (nucleoside diphosphate linked moiety X)-type motif 1                              |
| RSPH10B2    | 7 | None | 68.3 | 99.9  | radial spoke head 10 homolog B2 (Chlamydomonas)                                          |
| NFE2L3      | 7 | None | 81.9 | 100.0 | nuclear factor, erythroid 2-like 3                                                       |
| SEPT7       | 7 | None | 67.3 | 99.9  | septin 7                                                                                 |
| VOPP1       | 7 | None | 74.8 | 100.0 | vesicular, overexpressed in cancer, prosurvival protein 1                                |
| CHCHD2      | 7 | None | 74.5 | 100.0 | coiled-coil-helix-coiled-coil-helix domain containing 2                                  |
| ATP5J2      | 7 | None | 36.4 | 100.0 | ATP synthase, H <sup>+</sup> transporting, mitochondrial Fo complex, subunit F2          |
| CLEC2L      | 7 | None | 80.6 | 100.0 | C-type lectin domain family 2, member L                                                  |
| MKRN1       | 7 | None | 69.4 | 99.9  | makorin ring finger protein 1                                                            |
| XRCC2       | 7 | None | 84.2 | 100.0 | X-ray repair complementing defective repair in Chinese hamster cells 2                   |
| FBXO16      | 8 | None | 80.7 | 100.0 | F-box protein 16                                                                         |
| NKX6-3      | 8 | None | 67.1 | 99.8  | NK6 homeobox 3                                                                           |
| CEBPD       | 8 | None | 83.8 | 100.0 | CCAAT/enhancer binding protein (C/EBP), delta                                            |

|          |    |      |      |       |                                                                              |
|----------|----|------|------|-------|------------------------------------------------------------------------------|
| LYPLA1   | 8  | None | 82.9 | 100.0 | lysophospholipase I                                                          |
| TCF24    | 8  | None | 78.1 | 100.0 | transcription factor 24                                                      |
| FABP5    | 8  | None | 65.5 | 100.0 | fatty acid binding protein 5 (psoriasis-associated)                          |
| YWHAZ    | 8  | None | 79.9 | 100.0 | tyrosine 3-monooxygenase/tryptophan 5-monooxygenase activation protein, zeta |
| KHDRBS3  | 8  | None | 79.1 | 99.9  | KH domain containing, RNA binding, signal transduction associated 3          |
| BOP1     | 8  | None | 72.2 | 82.8  | block of proliferation 1                                                     |
| RPL8     | 8  | None | 84.8 | 100.0 | ribosomal protein L8                                                         |
| AK3      | 9  | None | 75.8 | 100.0 | adenylate kinase 3                                                           |
| IFNA4    | 9  | None | 13.5 | 100.0 | interferon, alpha 4                                                          |
| ANKRD18B | 9  | None | 67.2 | 100.0 | ankyrin repeat domain 18B                                                    |
| ANKRD18A | 9  | None | 66.1 | 100.0 | ankyrin repeat domain 18A                                                    |
| SUSD3    | 9  | None | 79.6 | 100.0 | sushi domain containing 3                                                    |
| TMEFF1   | 9  | None | 45.2 | 100.0 | transmembrane protein with EGF-like and two follistatin-like domains 1       |
| OR13C2   | 9  | None | 63.9 | 100.0 | olfactory receptor, family 13, subfamily C, member 2                         |
| GNG10    | 9  | None | 61.2 | 100.0 | guanine nucleotide binding protein (G protein), gamma 10                     |
| FPGS     | 9  | None | 85.0 | 99.6  | folylpolyglutamate synthase                                                  |
| SET      | 9  | None | 78.9 | 99.7  | SET nuclear oncogene                                                         |
| SH3GLB2  | 9  | None | 79.6 | 100.0 | SH3-domain GRB2-like endophilin B2                                           |
| IER5L    | 9  | None | 83.8 | 100.0 | immediate early response 5-like                                              |
| NCS1     | 9  | None | 84.9 | 98.9  | neuronal calcium sensor 1                                                    |
| C9orf172 | 9  | None | 75.1 | 99.9  | chromosome 9 open reading frame 172                                          |
| C9orf37  | 9  | None | 0.0  | 100.0 | chromosome 9 open reading frame 37                                           |
| TMEM236  | 10 | None | 53.7 | 97.8  | transmembrane protein 236                                                    |
| BMI1     | 10 | None | 6.0  | 92.8  | BMI1 polycomb ring finger oncogene                                           |
| MTRNR2L7 | 10 | None | 8.4  | 100.0 | MT-RNR2-like 7                                                               |
| UTF1     | 10 | None | 49.8 | 100.0 | undifferentiated embryonic cell transcription factor 1                       |
| SCT      | 11 | None | 65.3 | 99.6  | secretin                                                                     |
| DUSP8    | 11 | None | 79.9 | 100.0 | dual specificity phosphatase 8                                               |
| KRTAP5-3 | 11 | None | 58.0 | 100.0 | keratin associated protein 5-3                                               |
| C11orf91 | 11 | None | 83.1 | 97.4  | chromosome 11 open reading frame 91                                          |
| SYT7     | 11 | None | 82.6 | 100.0 | synaptotagmin VII                                                            |
| C11orf83 | 11 | None | 79.8 | 100.0 | chromosome 11 open reading frame 83                                          |
| CNIH2    | 11 | None | 82.6 | 99.8  | cornichon family AMPA receptor auxiliary protein 2                           |
| ANAPC15  | 11 | None | 67.5 | 100.0 | anaphase promoting complex subunit 15                                        |
| RAB6A    | 11 | None | 82.3 | 100.0 | RAB6A, member RAS oncogene family                                            |
| CLNS1A   | 11 | None | 82.2 | 100.0 | chloride channel, nucleotide-sensitive, 1A                                   |

|             |    |      |      |       |                                                              |
|-------------|----|------|------|-------|--------------------------------------------------------------|
| TMPRSS5     | 11 | None | 83.8 | 100.0 | transmembrane protease, serine 5                             |
| NRGN        | 11 | None | 78.1 | 100.0 | neurogranin (protein kinase C substrate, RC3)                |
| PTMS        | 12 | None | 81.1 | 100.0 | parathymosin                                                 |
| NANOG       | 12 | None | 70.5 | 100.0 | Nanog homeobox                                               |
| KLRC4-KLRK1 | 12 | None | 54.2 | 100.0 | KLRC4-KLRK1 readthrough                                      |
| PRR4        | 12 | None | 84.9 | 100.0 | proline rich 4 (lacrimal)                                    |
| LALBA       | 12 | None | 73.2 | 100.0 | lactalbumin, alpha-                                          |
| DNAJC22     | 12 | None | 75.1 | 100.0 | DnaJ (Hsp40) homolog, subfamily C, member 22                 |
| POU6F1      | 12 | None | 78.4 | 100.0 | POU class 6 homeobox 1                                       |
| SMAGP       | 12 | None | 51.0 | 100.0 | small cell adhesion glycoprotein                             |
| FIGNL2      | 12 | None | 84.2 | 100.0 | fidetin-like 2                                               |
| EIF4B       | 12 | None | 77.9 | 100.0 | eukaryotic translation initiation factor 4B                  |
| MARCH9      | 12 | None | 78.3 | 99.8  | membrane-associated ring finger (C3HC4) 9                    |
| LLPH        | 12 | None | 14.8 | 100.0 | LLP homolog, long-term synaptic facilitation (Aplysia)       |
| C12orf73    | 12 | None | 67.8 | 100.0 | chromosome 12 open reading frame 73                          |
| C12orf75    | 12 | None | 74.7 | 100.0 | chromosome 12 open reading frame 75                          |
| CKAP4       | 12 | None | 80.5 | 100.0 | cytoskeleton-associated protein 4                            |
| CCDC42B     | 12 | None | 80.5 | 100.0 | coiled-coil domain containing 42B                            |
| SDS         | 12 | None | 79.7 | 100.0 | serine dehydratase                                           |
| C12orf49    | 12 | None | 82.0 | 100.0 | chromosome 12 open reading frame 49                          |
| HRK         | 12 | None | 54.1 | 100.0 | harakiri, BCL2 interacting protein                           |
| RPLP0       | 12 | None | 84.1 | 100.0 | ribosomal protein, large, P0                                 |
| SETD8       | 12 | None | 73.5 | 100.0 | SET domain containing (lysine methyltransferase) 8           |
| MMP17       | 12 | None | 86.2 | 100.0 | matrix metalloproteinase 17 (membrane-inserted)              |
| FBRSL1      | 12 | None | 85.8 | 99.8  | fibrosin-like 1                                              |
| PXMP2       | 12 | None | 81.4 | 100.0 | peroxisomal membrane protein 2, 22kDa                        |
| IL17D       | 13 | None | 81.1 | 100.0 | interleukin 17D                                              |
| USP12       | 13 | None | 67.9 | 100.0 | ubiquitin specific peptidase 12                              |
| OR4N2       | 14 | None | 66.5 | 100.0 | olfactory receptor, family 4, subfamily N, member 2          |
| CCNB1IP1    | 14 | None | 74.0 | 100.0 | cyclin B1 interacting protein 1, E3 ubiquitin protein ligase |
| TPPP2       | 14 | None | 81.7 | 100.0 | tubulin polymerization-promoting protein family member 2     |
| RPS29       | 14 | None | 73.4 | 100.0 | ribosomal protein S29                                        |
| PLEK2       | 14 | None | 84.2 | 100.0 | pleckstrin 2                                                 |
| ACOT4       | 14 | None | 83.2 | 100.0 | acyl-CoA thioesterase 4                                      |
| TMED10      | 14 | None | 83.3 | 99.3  | transmembrane emp24-like trafficking protein 10 (yeast)      |
| COX8C       | 14 | None | 69.6 | 100.0 | cytochrome c oxidase subunit VIIIc                           |
| IFI27L1     | 14 | None | 70.9 | 100.0 | interferon, alpha-inducible                                  |



|          |    |      |      |       |                                                                                               |
|----------|----|------|------|-------|-----------------------------------------------------------------------------------------------|
|          |    |      |      |       | protein 27-like 1                                                                             |
| HHIPL1   | 14 | None | 83.3 | 97.7  | HHIP-like 1                                                                                   |
| NUDT14   | 14 | None | 80.4 | 99.6  | nudix (nucleoside diphosphate linked moiety X)-type motif 14                                  |
| TEX22    | 14 | None | 57.2 | 100.0 | testis expressed 22                                                                           |
| CRIP1    | 14 | None | 64.8 | 100.0 | cysteine-rich protein 1 (intestinal)                                                          |
| AVEN     | 15 | None | 81.1 | 99.9  | apoptosis, caspase activation inhibitor                                                       |
| GOLGA8B  | 15 | None | 24.8 | 100.0 | golgin A8 family, member B                                                                    |
| MAPK6    | 15 | None | 76.1 | 99.9  | mitogen-activated protein kinase 6                                                            |
| TMEM202  | 15 | None | 76.2 | 100.0 | transmembrane protein 202                                                                     |
| COX5A    | 15 | None | 80.7 | 100.0 | cytochrome c oxidase subunit Va                                                               |
| COMMD4   | 15 | None | 79.5 | 100.0 | COMM domain containing 4                                                                      |
| ADAMTS7  | 15 | None | 78.6 | 99.7  | ADAM metalloproteinase with thrombospondin type 1 motif, 7                                    |
| MORF4L1  | 15 | None | 75.6 | 100.0 | mortality factor 4 like 1                                                                     |
| WHAMM    | 15 | None | 83.5 | 100.0 | WAS protein homolog associated with actin, golgi membranes and microtubules                   |
| FAM103A1 | 15 | None | 74.7 | 100.0 | family with sequence similarity 103, member A1                                                |
| HDGFRP3  | 15 | None | 80.3 | 100.0 | Hepatoma-derived growth factor-related protein 3                                              |
| HBZ      | 16 | None | 59.8 | 78.1  | hemoglobin, zeta                                                                              |
| NME4     | 16 | None | 83.2 | 99.9  | NME/NM23 nucleoside diphosphate kinase 4                                                      |
| C16orf13 | 16 | None | 71.7 | 100.0 | chromosome 16 open reading frame 13                                                           |
| METRNL   | 16 | None | 66.3 | 99.3  | meteorin, glial cell differentiation regulator                                                |
| TPSD1    | 16 | None | 75.6 | 100.0 | tryptase delta 1                                                                              |
| HS3ST6   | 16 | None | 77.2 | 98.8  | heparan sulfate (glucosamine) 3-O-sulfotransferase 6                                          |
| SLC9A3R2 | 16 | None | 80.4 | 100.0 | solute carrier family 9, subfamily A (NHE3, cation proton antiporter 3), member 3 regulator 2 |
| TCEB2    | 16 | None | 5.3  | 99.6  | transcription elongation factor B (SIII), polypeptide 2 (18kDa, elongin B)                    |
| HCFC1R1  | 16 | None | 82.1 | 100.0 | host cell factor C1 regulator 1 (XPO1 dependent)                                              |
| MTRNR2L4 | 16 | None | 58.1 | 100.0 | MT-RNR2-like 4                                                                                |
| DEXI     | 16 | None | 31.1 | 100.0 | Dexi homolog (mouse)                                                                          |
| SOCS1    | 16 | None | 77.2 | 100.0 | suppressor of cytokine signaling 1                                                            |
| MPV17L   | 16 | None | 73.5 | 100.0 | MPV17 mitochondrial membrane protein-like                                                     |
| C16orf52 | 16 | None | 65.6 | 98.7  | chromosome 16 open reading frame 52                                                           |
| FAM57B   | 16 | None | 79.0 | 97.1  | family with sequence similarity 57, member B                                                  |
| CTF1     | 16 | None | 75.3 | 100.0 | cardiotrophin 1                                                                               |
| COX6A2   | 16 | None | 75.0 | 94.3  | cytochrome c oxidase subunit VIa polypeptide 2                                                |

|           |    |      |      |       |                                                                                         |
|-----------|----|------|------|-------|-----------------------------------------------------------------------------------------|
| BRD7      | 16 | None | 82.2 | 99.9  | bromodomain containing 7                                                                |
| BCAR1     | 16 | None | 85.1 | 100.0 | breast cancer anti-estrogen resistance 1                                                |
| WFDC1     | 16 | None | 80.5 | 100.0 | WAP four-disulfide core domain 1                                                        |
| ZFPM1     | 16 | None | 77.2 | 99.9  | zinc finger protein, FOG family member 1                                                |
| DBNDD1    | 16 | None | 84.8 | 100.0 | dysbindin (dystrobrevin binding protein 1) domain containing 1                          |
| RILP      | 17 | None | 82.9 | 99.1  | Rab interacting lysosomal protein                                                       |
| C1QB8P    | 17 | None | 70.2 | 99.9  | complement component 1, q subcomponent binding protein                                  |
| MAP2K4    | 17 | None | 84.4 | 100.0 | mitogen-activated protein kinase kinase 4                                               |
| FAM18B2   | 17 | None | 77.9 | 99.8  | trans-golgi network vesicle protein 23 homolog C (S. cerevisiae)                        |
| LGALS9    | 17 | None | 59.4 | 100.0 | lectin, galactoside-binding, soluble, 9                                                 |
| C17orf50  | 17 | None | 78.2 | 100.0 | chromosome 17 open reading frame 50                                                     |
| CCL3      | 17 | None | 71.8 | 100.0 | chemokine (C-C motif) ligand 3                                                          |
| CCL4      | 17 | None | 60.6 | 100.0 | chemokine (C-C motif) ligand 4                                                          |
| PTGES3L   | 17 | None | 80.1 | 99.9  | prostaglandin E synthase 3 (cytosolic)-like                                             |
| C17orf105 | 17 | None | 82.2 | 100.0 | chromosome 17 open reading frame 105                                                    |
| FAM171A2  | 17 | None | 76.2 | 100.0 | family with sequence similarity 171, member A2                                          |
| TBKBP1    | 17 | None | 82.3 | 98.9  | TBK1 binding protein 1                                                                  |
| CBX1      | 17 | None | 66.9 | 100.0 | chromobox homolog 1                                                                     |
| SNX11     | 17 | None | 84.8 | 100.0 | sorting nexin 11                                                                        |
| ATP5G1    | 17 | None | 73.4 | 99.9  | ATP synthase, H+ transporting, mitochondrial Fo complex, subunit C1 (subunit 9)         |
| C17orf77  | 17 | None | 44.3 | 100.0 | chromosome 17 open reading frame 77                                                     |
| SUMO2     | 17 | None | 76.2 | 100.0 | small ubiquitin-like modifier 2                                                         |
| SYNGR2    | 17 | None | 81.9 | 100.0 | synaptogyrin 2                                                                          |
| CHMP6     | 17 | None | 82.6 | 100.0 | charged multivesicular body protein 6                                                   |
| C17orf89  | 17 | None | 65.9 | 100.0 | chromosome 17 open reading frame 89                                                     |
| NOTUM     | 17 | None | 80.5 | 98.4  | notum pectinacetyltransferase homolog (Drosophila)                                      |
| RAC3      | 17 | None | 80.0 | 98.0  | ras-related C3 botulinum toxin substrate 3 (rho family, small GTP binding protein Rac3) |
| FN3K      | 17 | None | 84.4 | 99.8  | fructosamine 3 kinase                                                                   |
| METRNL    | 17 | None | 80.9 | 99.7  | meteorin, glial cell differentiation regulator-like                                     |
| TUBB6     | 18 | None | 83.0 | 100.0 | tubulin, beta 6 class V                                                                 |
| SLMO1     | 18 | None | 78.4 | 100.0 | slowmo homolog 1 (Drosophila)                                                           |
| SERPINB10 | 18 | None | 81.9 | 100.0 | serpin peptidase inhibitor, clade B (ovalbumin), member 10                              |

|          |    |      |      |       |                                                                                                |
|----------|----|------|------|-------|------------------------------------------------------------------------------------------------|
| SHC2     | 19 | None | 76.9 | 99.5  | SHC (Src homology 2 domain containing) transforming protein 2                                  |
| ODF3L2   | 19 | None | 80.5 | 100.0 | outer dense fiber of sperm tails 3-like 2                                                      |
| HCN2     | 19 | None | 58.8 | 95.5  | hyperpolarization activated cyclic nucleotide-gated potassium channel 2                        |
| FGF22    | 19 | None | 72.6 | 100.0 | fibroblast growth factor 22                                                                    |
| RNF126   | 19 | None | 80.6 | 99.1  | ring finger protein 126                                                                        |
| PALM     | 19 | None | 77.9 | 98.7  | paralemmin                                                                                     |
| R3HDM4   | 19 | None | 78.6 | 100.0 | R3H domain containing 4                                                                        |
| GRIN3B   | 19 | None | 79.7 | 100.0 | glutamate receptor, ionotropic, N-methyl-D-aspartate 3B                                        |
| C19orf26 | 19 | None | 79.4 | 99.9  | chromosome 19 open reading frame 26                                                            |
| EFNA2    | 19 | None | 76.7 | 99.2  | ephrin-A2                                                                                      |
| RPS15    | 19 | None | 62.2 | 100.0 | ribosomal protein S15                                                                          |
| MEX3D    | 19 | None | 77.1 | 97.2  | mex-3 RNA binding family member D                                                              |
| TCF3     | 19 | None | 78.6 | 99.9  | transcription factor 3                                                                         |
| ONECUT3  | 19 | None | 53.9 | 98.5  | one cut homeobox 3                                                                             |
| KLF16    | 19 | None | 61.0 | 99.7  | Kruppel-like factor 16                                                                         |
| ABHD17A  | 19 | None | 80.0 | 100.0 | abhydrolase domain containing 17A                                                              |
| CSNK1G2  | 19 | None | 83.5 | 98.9  | casein kinase 1, gamma 2                                                                       |
| BTBD2    | 19 | None | 85.2 | 98.7  | BTB (POZ) domain containing 2                                                                  |
| GNG7     | 19 | None | 78.7 | 100.0 | guanine nucleotide binding protein (G protein), gamma 7                                        |
| MPND     | 19 | None | 82.2 | 100.0 | MPN domain containing                                                                          |
| CHAF1A   | 19 | None | 85.2 | 100.0 | chromatin assembly factor 1, subunit A (p150)                                                  |
| RPL36    | 19 | None | 80.5 | 100.0 | ribosomal protein L36                                                                          |
| C19orf70 | 19 | None | 71.4 | 100.0 | chromosome 19 open reading frame 70                                                            |
| MLLT1    | 19 | None | 83.6 | 99.2  | myeloid/lymphoid or mixed-lineage leukemia (trithorax homolog, Drosophila); translocated to, 1 |
| ALKBH7   | 19 | None | 72.3 | 100.0 | alkB, alkylation repair homolog 7 (E. coli)                                                    |
| PET100   | 19 | None | 81.2 | 100.0 | PET100 homolog (S. cerevisiae)                                                                 |
| PIN1     | 19 | None | 80.7 | 100.0 | peptidylprolyl cis/trans isomerase, NIMA-interacting 1                                         |
| S1PR5    | 19 | None | 83.9 | 100.0 | sphingosine-1-phosphate receptor 5                                                             |
| C19orf80 | 19 | None | 70.6 | 100.0 | chromosome 19 open reading frame 80                                                            |
| TSPAN16  | 19 | None | 78.0 | 100.0 | tetraspanin 16                                                                                 |
| ZNF69    | 19 | None | 73.0 | 100.0 | zinc finger protein 69                                                                         |
| SAMD1    | 19 | None | 79.1 | 98.6  | sterile alpha motif domain containing 1                                                        |
| NDUFB7   | 19 | None | 70.5 | 99.7  | NADH dehydrogenase (ubiquinone) 1 beta subcomplex, 7, 18kDa                                    |
| TMEM221  | 19 | None | 71.6 | 100.0 | transmembrane protein 221                                                                      |

|          |    |      |      |       |                                                                                             |
|----------|----|------|------|-------|---------------------------------------------------------------------------------------------|
| CCDC124  | 19 | None | 75.7 | 99.7  | coiled-coil domain containing 124                                                           |
| PBX4     | 19 | None | 84.7 | 100.0 | pre-B-cell leukemia homeobox 4                                                              |
| ZNF626   | 19 | None | 72.9 | 100.0 | zinc finger protein 626                                                                     |
| UQCRCF51 | 19 | None | 67.4 | 100.0 | ubiquinol-cytochrome c reductase, Rieske iron-sulfur polypeptide 1                          |
| PDCD5    | 19 | None | 79.1 | 100.0 | programmed cell death 5                                                                     |
| RHPN2    | 19 | None | 79.3 | 99.1  | rhophilin, Rho GTPase binding protein 2                                                     |
| SLC7A10  | 19 | None | 80.9 | 100.0 | solute carrier family 7 (neutral amino acid transporter light chain, asc system), member 10 |
| USF2     | 19 | None | 79.7 | 96.4  | upstream transcription factor 2, c-fos interacting                                          |
| LGALS7   | 19 | None | 17.8 | 100.0 | lectin, galactoside-binding, soluble, 7                                                     |
| C19orf69 | 19 | None | 50.2 | 100.0 | glutamate-rich 4                                                                            |
| GRIK5    | 19 | None | 83.4 | 100.0 | glutamate receptor, ionotropic, kainate 5                                                   |
| PSG2     | 19 | None | 44.4 | 100.0 | pregnancy specific beta-1-glycoprotein 2                                                    |
| APOC1    | 19 | None | 69.7 | 100.0 | apolipoprotein C-I                                                                          |
| BBC3     | 19 | None | 74.4 | 100.0 | BCL2 binding component 3                                                                    |
| PRR24    | 19 | None | 81.7 | 88.5  | proline rich 24                                                                             |
| MEIS3    | 19 | None | 81.1 | 100.0 | Meis homeobox 3                                                                             |
| DBP      | 19 | None | 82.1 | 100.0 | D site of albumin promoter (albumin D-box) binding protein                                  |
| CGB7     | 19 | None | 11.0 | 100.0 | chorionic gonadotropin, beta polypeptide 7                                                  |
| LIN7B    | 19 | None | 83.1 | 100.0 | lin-7 homolog B (C. elegans)                                                                |
| ZNF578   | 19 | None | 74.3 | 100.0 | zinc finger protein 578                                                                     |
| TMEM86B  | 19 | None | 82.2 | 100.0 | transmembrane protein 86B                                                                   |
| TMEM238  | 19 | None | 46.1 | 100.0 | transmembrane protein 238                                                                   |
| UBE2S    | 19 | None | 75.1 | 100.0 | ubiquitin-conjugating enzyme E2S                                                            |
| RFPL4A   | 19 | None | 52.9 | 100.0 | ret finger protein-like 4A                                                                  |
| ZBTB45   | 19 | None | 82.1 | 100.0 | zinc finger and BTB domain containing 45                                                    |
| TCF15    | 20 | None | 74.9 | 100.0 | transcription factor 15 (basic helix-loop-helix)                                            |
| SIRPB1   | 20 | None | 66.5 | 63.6  | signal-regulatory protein beta 1                                                            |
| EBF4     | 20 | None | 80.1 | 99.1  | early B-cell factor 4                                                                       |
| SNX5     | 20 | None | 80.9 | 100.0 | sorting nexin 5                                                                             |
| DEFB119  | 20 | None | 72.6 | 100.0 | defensin, beta 119                                                                          |
| CCM2L    | 20 | None | 83.0 | 99.9  | cerebral cavernous malformation 2-like                                                      |
| GHRH     | 20 | None | 81.9 | 100.0 | growth hormone releasing hormone                                                            |
| EMILIN3  | 20 | None | 75.9 | 100.0 | elastin microfibril interfacer 3                                                            |
| WFDC8    | 20 | None | 80.1 | 100.0 | WAP four-disulfide core domain 8                                                            |
| FAM210B  | 20 | None | 83.1 | 100.0 | family with sequence similarity 210, member B                                               |
| TAF4     | 20 | None | 85.9 | 97.5  | TAF4 RNA polymerase II, TATA box binding protein                                            |

|           |    |      |      |       |                                                                                |
|-----------|----|------|------|-------|--------------------------------------------------------------------------------|
|           |    |      |      |       | (TBP)-associated factor, 135kDa                                                |
| TCFL5     | 20 | None | 65.7 | 99.1  | transcription factor-like 5 (basic helix-loop-helix)                           |
| LIME1     | 20 | None | 73.9 | 100.0 | Lck interacting transmembrane adaptor 1                                        |
| LKAAEAR1  | 20 | None | 73.3 | 100.0 | LKAAEAR motif containing 1                                                     |
| MRPS6     | 21 | None | 85.1 | 97.5  | mitochondrial ribosomal protein S6                                             |
| HMG1      | 21 | None | 74.5 | 97.9  | high mobility group nucleosome binding domain 1                                |
| FAM207A   | 21 | None | 66.6 | 100.0 | family with sequence similarity 207, member A                                  |
| GSC2      | 22 | None | 76.9 | 100.0 | goosecoid homeobox 2                                                           |
| RTN4R     | 22 | None | 83.5 | 100.0 | reticulin 4 receptor                                                           |
| EIF4ENIF1 | 22 | None | 86.0 | 100.0 | eukaryotic translation initiation factor 4E nuclear import factor 1            |
| SLC16A8   | 22 | None | 75.9 | 100.0 | solute carrier family 16 (monocarboxylate transporter), member 8               |
| ST13      | 22 | None | 72.3 | 100.0 | suppression of tumorigenicity 13 (colon carcinoma) (Hsp70 interacting protein) |
| PRR5      | 22 | None | 78.4 | 100.0 | proline rich 5 (renal)                                                         |
| ARHGAP8   | 22 | None | 0.0  | 98.5  | Rho GTPase activating protein 8                                                |
| PRKX      | X  | None | 70.8 | 100.0 | protein kinase, X-linked                                                       |
| MTRNR2L10 | X  | None | 34.5 | 100.0 | MT-RNR2-like 10                                                                |
| EDA2R     | X  | None | 83.9 | 100.0 | ectodysplasin A2 receptor                                                      |
| NONO      | X  | None | 80.8 | 100.0 | non-POU domain containing, octamer-binding                                     |
| FAM50A    | X  | None | 82.4 | 99.9  | family with sequence similarity 50, member A                                   |

## References for supporting information:

1. You FM et al. (2008) BatchPrimer3: a high throughput web application for PCR and sequencing primer design. *BMC Bioinformatics* 9:253.
2. Flicek P et al. (2014) Ensembl 2014. *Nucleic Acids Res* 42:D749–D755.
3. Durinck S, Spellman PT, Birney E, Huber W (2009) Mapping identifiers for the integration of genomic datasets with the R/Bioconductor package biomaRt. *Nat Protoc* 4:1184–1191.
